# 1 **Encoding of Tactile Context in the Mouse Visual Cortex**

2 Steffen Kandler,<sup>1,2,7</sup> Dun Mao,<sup>1,3,7</sup> Bruce L. McNaughton,<sup>1,3,4</sup> and Vincent Bonin<sup>1,5,6,8,\*</sup>

3 <sup>1</sup>Neuro-Electronics Research Flanders (NERF), Kapeldreef 75, 3001 Leuven, Belgium

4 <sup>2</sup>Imec, Kapeldreef 75, 3001 Leuven, Belgium

5 <sup>3</sup>Canadian Centre for Behavioral Neuroscience (CCBN), University of Lethbridge, Lethbridge, Alberta T1K 3M4,  
6 Canada

7 <sup>4</sup>Department of Neurobiology and Behavior, University of California Irvine, USA

8 <sup>5</sup>Vlaams Instituut voor Biotechnologie (VIB), 3001 Leuven, Belgium

9 <sup>6</sup>Department of Biology, KU Leuven, Naamsestraat 61, 3000 Leuven, Belgium

10 <sup>7</sup>These authors contributed equally

11 <sup>8</sup>Lead Contact

12 \*Correspondence: vincent.bonin@nerf.be

13

## 14 **SUMMARY**

15 **Primary sensory cortices have been linked to the processing and perception of signals**  
16 **from non-preferred sensory modalities. The cellular activity patterns underlying these**  
17 **cross-modal influences, however, are not known and measurements in intact animals**  
18 **during ethologically relevant behaviours are lacking. We examined the hypothesis that,**  
19 **during real-world behaviour, tactile inputs are encoded in the rodent primary visual**  
20 **cortex (V1) enabling the contextualisation of visual signals. We studied cellular activity in**  
21 **mouse V1 during active exploration of a controlled tactile environment. We identified a**  
22 **population of V1 neurons that specifically encodes tactile stimuli sensed by the**  
23 **whiskers. The neurons show activation in response to tactile stimuli independent of**  
24 **visual inputs. The responses are diverse and selective providing diverse contextual and**  
25 **locational information. In addition, V1 visually responsive cells show response**  
26 **modulations linked to tactile stimuli suggesting they receive subthreshold inputs from**  
27 **tactile neurons. These results indicate that mouse V1 encodes functionally diverse**  
28 **cross-modal signals during real-world behaviour. They suggest a coding strategy**  
29 **whereby signals from distant brain regions converge onto functionally distinct cell**  
30 **groups in primary sensory areas to mediate contextual modulations of primary sensory**  
31 **activity. This convergence may enable early multisensory associations in aid of**  
32 **navigation or exploration behaviours.**

33

34 **Keywords**

35 Visual cortex; Tactile activity; Cross-modal; Calcium imaging; Two-photon

36

37 **Highlights**

- 38 • Head-fixed exploration assay to study influence of tactile context on V1 processing.
- 39 • V1 subpopulation preferentially encodes somatosensory inputs from the whiskers.
- 40 • V1 tactile responses carry diverse contextual and locational information.
- 41 • V1 visual responses show modulations linked to tactile inputs.

42

43 **In Brief**

44 By imaging mouse V1 neurons during head-fixed exploration of a controlled tactile environment,  
45 Kandler et al. show that V1 neurons exhibit diverse cross-modal contextual activity modulations  
46 and identify a cell subpopulation that preferentially encodes somatosensory inputs from the  
47 whiskers.

48

49

50 **INTRODUCTION**

51 There is a growing body of data linking primary sensory cortices to multisensory processing  
52 (Driver and Noesselt, 2008; Ghazanfar and Schroeder, 2006; Schroeder and Foxe, 2005; Stein  
53 and Stanford, 2008). The primary visual cortex (V1) receives abundant multimodal projections  
54 from other sensory cortical areas (Charbonneau et al., 2012; Falchier et al., 2002; Kim et al.,  
55 2015; Masse et al., 2016; Rockland and Ojima, 2003; Stehberg et al., 2014; Van Brussel et al.,  
56 2011). EEG recordings and functional imaging studies show that V1 is subject to cross-modal  
57 influences of its neural activity at the level of aggregate neural ensembles (De Meo et al., 2015;  
58 Murray et al., 2015). Similar effects are observed in blind and sighted subjects (Amedi et al.,  
59 2010; Merabet and Pascual-Leone, 2010; Sathian, 2005) suggesting a role for this activity in  
60 normal sensory function.

61

62 *In vivo* physiological studies in monkeys and rodents also indicate influences of cross-modal  
63 stimuli on the activity of individual V1 neurons. Cross-modal stimulation can produce  
64 subthreshold inputs and modulate neuronal outputs (Bieler et al., 2017; Ibrahim et al., 2016;  
65 Iurilli et al., 2012; Kayser et al., 2008, 2009; Lakatos et al., 2009; Wang et al., 2008) and even

66 activate cortical neurons (Bieler et al., 2017; Bizley et al., 2007; Ibrahim et al., 2016; Newton et  
67 al., 2002; Wallace et al., 2004). Activation of a specific neuronal population by auditory  
68 stimulation has been reported (Ibrahim et al., 2016). However, there is little data on the tuning of  
69 cross-modal signals in V1 and other primary sensory cortices.

70

71 Animals make use of visual and somatosensory information to move through their environment.  
72 Vision and touch provide distinct yet complementary information about objects (Kleinfeld et al.,  
73 2006), obstacles (Sofroniew et al., 2014), and self-motion (Jenks et al., 2010). Studies in  
74 humans and monkeys have shown that V1 can respond to tactile stimuli and is involved in  
75 tactile perception (Guipponi et al., 2015; Murray et al., 2015; Pascual-Leone et al., 2005;  
76 Sathian and Zangaladze, 2002; Zangaladze et al., 1999). Studies in rodents show that passive  
77 mechanical stimulation of the whiskers can hyperpolarize V1 membrane potentials and  
78 suppress neural firing (Iurilli et al., 2012). While tactile stimuli provide subthreshold inputs  
79 whether they can activate V1 neurons is debated (Bieler et al., 2017; Newton et al., 2002;  
80 Vasconcelos et al., 2011; Wallace et al., 2004). Studies in freely-moving rats, however, reported  
81 activity linked to location (Haggerty and Ji, 2015 1508; Ji and Wilson, 2007), objects and tactile  
82 behaviour (Vasconcelos et al., 2011), which could reflect tactile inputs. Precisely what tactile  
83 information is encoded in V1 during behaviour is unclear and how signals from preferred and  
84 non-preferred sensory modalities are encoded in V1 populations is not well understood.

85

86 We investigated the impact of tactile inputs on activity in the mouse primary visual cortex during  
87 head-fixed active whisking and locomotor behaviour using controlled sensory stimuli. We  
88 identified a population of neurons that show specific responses to tactile stimuli encoding  
89 somatosensory inputs from the whiskers. These neurons showed diversely tuned responses to  
90 stimuli and location in the tactile environment. Visual responsive cells showed response  
91 modulations that could be traced back to tactile stimuli in the environment. These results  
92 indicate that mouse V1 encodes functionally diverse cross-modal signals during navigation or  
93 exploration behaviours. This convergence of cross-modal information onto a functionally distinct  
94 cell group may enable early multisensory associations in aid of ethological relevant behaviours.

95

96

97

## 98 **RESULTS**

99 To investigate the encoding of tactile information in the mouse primary visual cortex (V1), we  
100 combined cellular imaging with a head-fixed treadmill locomotion assay. C57Bl/6j mice (n = 23  
101 animals) were implanted with a head fixation plate and trained to voluntarily run on a low-friction  
102 150-cm linear treadmill for a water reward (Fig. 1A; Suppl. Figs S1A–C, S2). After 2-3 weeks of  
103 training (typ. 10 to 15 sessions), the animals were highly engaged during the task (Suppl. Fig.  
104 S1D), running at high speed (typ. 20 cm/s, range 10 to 50 cm/s) for sessions lasting 1 hour,  
105 generating hundreds of laps per session.

106  
107 To probe the neurons' sensory response properties, animals were head-fixed under a two-  
108 photon microscope and visual and tactile stimuli were delivered as animals ran on the treadmill  
109 (Fig. 1A; Suppl. Fig. S1A–C,G). Somatic calcium signals were imaged from GCaMP6-labeled  
110 neurons in V1 layer 2/3 (125 to 350  $\mu\text{m}$  below pia) through a glass window implanted over left  
111 posterior cortex. Sensory stimuli were delivered upon treadmill movement. For visual  
112 stimulation, pseudo-random stimuli were shown to the contralateral right eye as the animal ran  
113 across fixed locations on the treadmill (see Experimental Procedures). For tactile stimulation,  
114 strips of material attached to the treadmill belt surface were used to periodically contact the  
115 whiskers as the animals moved the belt (Suppl. Fig. S1H; Suppl. Figs S2B). A shield positioned  
116 just above the treadmill blocked the belt and approaching tactile stimuli from the animal's line of  
117 sight (Fig. 1A; Suppl. Fig. S1A-B). Taking movement speed into account, each strip was within  
118 the whiskers' reach for only a few tens of milliseconds. Cellular imaging in the S1 barrel field of  
119 the somatosensory cortex confirmed robust responses from somatosensory neurons (Suppl.  
120 Fig. S3C). To examine the responses, calcium time courses were deconvolved and expressed  
121 as a function of location on the treadmill in 1-cm intervals, normalizing activity by time spent at  
122 individual intervals (Gothard et al., 1996; Mao et al.). Only activity during locomotion epochs (>  
123 2 cm/s) was considered. The resulting position related activity profiles allowed relating the  
124 neurons' firing responses to tactile stimuli on the treadmill (Suppl. Fig. S3D).

125

### 126 **Activation of V1 Neurons by Tactile Stimuli**

127 To determine whether V1 neurons show somatosensory responses to tactile stimuli during  
128 locomotion on the treadmill, we compared activity in darkness and at a photopic light level on  
129 treadmills with or without stimuli (Fig. 1B; Suppl. Fig. S2B). Animals were trained on a treadmill

130 devoid of stimuli (blank belt, Suppl. Fig. S2A). Activity from the same population of neurons was  
131 measured in consecutive blocks of trials on a treadmill devoid of stimuli and on a treadmill with  
132 two identical sets of stimuli (Fig. 1B,C; see Experimental Procedures, Experiment 1). To test for  
133 inputs from the whiskers or the paws, we measured, in a separate block of trials, V1 activity on  
134 a treadmill with tactile stimuli in presence of a barrier preventing whiskers from touching the belt  
135 and stimuli (Fig. 1B).

136

137 We obtained the calcium activity courses of 2,925 layer 2/3 neurons from monocular V1 ( $n = 7$   
138 mice). For all experiments, the two-photon microscope was centred on the retinotopic subregion  
139 of V1 activated by a monocular visual stimulus of 60 deg. width centred at 45 deg. azimuth and  
140 0 deg. elevation. We focused our analyses on neurons that showed one or more calcium  
141 transients in at least 25 % of the laps ( $> \text{baseline } dF/F_0 + 3\text{-times s.d.}$ ) (2,925 / 3,317 cells). To  
142 identify cells responding to the tactile stimuli, we compared calcium activity in a time window  
143 preceding the animals reaching the tactile stimuli to a similarly sized window centred on the  
144 stimuli. We identified cells that showed a pronounced increase in fluorescence at least at one of  
145 the tactile stimuli (1-way ANOVA,  $p < 0.01$ ;  $> 10\% dF/F_0$ ) and examined their activities in the  
146 blank belt and whisker barrier conditions.

147

148 About 9 % of the layer 2/3 neurons active during the task showed robust responses to the tactile  
149 stimuli ( $n = 112/1,270$  cells) (Fig. 1C–F). As can be appreciated from the computed position  
150 related activity profiles (Fig. 1C, middle; Suppl. Fig. S5D, right), these cells showed a sharp  
151 increase in calcium fluorescence at the tactile stimuli but little indication of activation elsewhere.  
152 The responses were specific to the stimuli; no position-locked calcium transients were observed  
153 on the belt devoid of stimuli (Fig. 1C, left, Suppl. Fig. S5D, left). Consistent with responses  
154 encoding touches between the whiskers and the stimuli, no responses to the tactile stimuli were  
155 observed from these neurons in the barrier condition (Fig. 1C, right). Responses were abolished  
156 even though the animals' paws had full access to the stimuli and running behaviour maintained  
157 (Fig. 1C, bottom).

158

159 Across the population of neurons activated by tactile stimuli, the average response across trials  
160 was  $16.1 \pm 1.8\% dF/F_0$  (mean  $\pm$  s.e.m.). This is several-fold the activity at matched locations on  
161 the belt devoid of stimuli ( $1.1 \pm 0.8\% dF/F_0$ , mean  $\pm$  s.e.m.) ( $n = 112/1,270$  cells) and in the

162 barrier condition ( $dF/F_0$ :  $15.4 \pm 3.1$  % vs.  $2.3 \pm 1.1$  %, mean  $\pm$  s.e.m,  $p < 1.5e-6$ , paired sign  
163 test) (Fig. 1D,F). In presence of the barrier, responses were close to those observed on the  
164 blank belt ( $dF/F_0$ :  $p < 0.1$ ; paired sign test) (Fig. 1F, 2B) and to those of the unresponsive  
165 population (Suppl. Fig. S5A). Importantly, these responses to tactile stimuli were observed both  
166 in darkness ( $< 0.01$  cd/m<sup>2</sup>) ( $n = 4$  animals) and under photopic illumination ( $59$  cd/m<sup>2</sup>) ( $n = 7$   
167 animals). The fraction of activated neurons and the amplitudes of responses were similar across  
168 illumination conditions (Fig. 1D–F).

169

### 170 **Somatosensory Inputs vs. Neuromodulatory Influences**

171 These activity patterns were inconsistent with general neuromodulatory or motor influences.  
172 Activation by tactile stimuli was restricted to a small subset of neurons (Suppl. Fig. S5C). No  
173 calcium transients linked to tactile stimuli were observed in the remainder of the population  
174 (Suppl. Fig. S5D). Pronounced responses were observed in absence of concomitant changes in  
175 movement speed and pupil size (Fig. 1C, bottom; Suppl. Fig. S1E). Finally, both locomotion and  
176 tactile stimuli had little impact on pupil size (Suppl. Fig. S1F).

177

178 To directly examine the possibility that the activity reflects motor output, we related the activity  
179 to movement onsets and offsets (Suppl. Fig. S4). Neither pupil size nor locomotion onsets and  
180 offsets explained the calcium transients observed at the tactile stimuli (Suppl. Fig. S4). This  
181 excludes roles for arousal and motor influences in the observed responses to tactile stimuli.

182

### 183 **Single Trial Responses to Tactile Stimuli**

184 Responses to tactile stimuli were discernible in individual trials (Fig. 2). The amplitude of single  
185 trial calcium transients of neurons activated by tactile stimuli was  $105.1 \pm 66.5$  %  $dF/F_0$  ( $n =$   
186  $1,345$ ;  $>$  baseline  $dF/F_0 + 3$ -times s.d.). Transients of such magnitudes correspond to neurons  
187 firing multiple action potentials in V1 layer 2/3 (Chen et al., 2013). The responses to tactile  
188 stimuli occurred from the first trials the animals ran on the belt with stimuli (Fig. 2A,C,D).

189 Responses were in fact observed in naïve animals that were never exposed to the belt with  
190 tactile stimuli (Fig. 2C). Responses showed no sign of abating as the animal ran multiple laps on  
191 the treadmill with stimuli (Fig. 2A,C,D) and disappeared from the first trials with the barrier (Fig.  
192 2A, bottom).

193

## 194 **Consistency of Activity Across Trials**

195 Transient onsets were consistently aligned to the stimuli across trials (Fig. 2A,C,D; Suppl. Fig.  
196 S4). The trial-to-trial alignment led to strong position related dependence seen in the average  
197 activity (Fig. 1C; Suppl. S5D). To examine this dependency, calcium time courses were  
198 deconvolved and expressed as a function of position. To quantify consistency of activity across  
199 trials, we calculated the fraction of variance in the single-lap, data that is explained by the  
200 average across laps (EV position; two-fold cross-validation, see Experimental Procedures).

201  
202 On the belt with tactile stimuli, the average across laps explained  $17.4 \pm 1.3$  % of the variance in  
203 the deconvolved single trial data (mean  $\pm$  s.e.m.;  $n = 112/1,270$  cells). On the belt lacking tactile  
204 stimuli, EV position was lower ( $4.5 \pm 0.6$  %) close to that observed in the broader population (EV  
205 position:  $5.1 \pm 0.2$  % vs.  $3.1 \pm 0.1$  % mean  $\pm$  s.e.m.) ( $n = 1158/1,270$  cells). Similar results were  
206 obtained in experiments with the barrier (EV position:  $15.1 \pm 2.0$  % vs.  $2.3 \pm 0.3$  %, mean  $\pm$   
207 s.e.m.,  $p < 5.6e-8$ , paired sign test) ( $n = 25/390$  cells). In presence of the barrier, EV position  
208 was close to that observed on the blank belt ( $dF/F_0$ :  $p < 0.1$ , EV position:  $p < 0.42$ ; paired sign  
209 test) (Fig. 1F, 2B) and that of the unresponsive population (Suppl. Fig. S5A). Amongst neurons  
210 activated by tactile stimuli, EV position was similar in 'naïve' animals never exposed to a belt  
211 with stimuli and previously-exposed animals (Fig. 2E).

212

## 213 **Tactile Stimuli Activate a Distinct Neural Population**

214 Do tactile activated neurons form a functionally distinct population? To determine whether  
215 neurons activated by tactile stimuli respond to visual stimulation and vice versa, we measured  
216 responses to tactile or visual stimuli from the same neural population (Fig. 3; Suppl. Figs S5,  
217 S2C). For tactile stimulation, repeated strips of material were placed at two locations on the  
218 treadmill belt. For visual stimulation, a brief, 1-sec visual stimulus was presented in lockstep  
219 with locomotion as the animal ran across either of two treadmill locations. The responses to the  
220 visual stimuli were assessed by comparing average calcium activities in 0.5-sec and 1.5-sec  
221 windows before and after stimulus onsets. Responses to the tactile stimuli were assessed as  
222 described above. Neurons were deemed responsive if activity was increased at either one of the  
223 two stimulus locations (1-way ANOVA,  $p < 0.01$ ).

224



225 We found no evidence of bimodal activation in the populations of layer 2/3 neurons we  
226 examined (Fig. 3A; Suppl. Fig. S5C–G) ( $n = 7$  animals). Neurons activated by the tactile stimuli  
227 ( $n = 51/716$  cells) showed no noticeable responses to the visual stimulus (Fig. 3A, cells 1,2;  
228 Suppl. Fig. S5F,G). Conversely, the neurons that showed activation by the visual stimulus ( $n =$   
229  $97/716$  cells) showed no responses to the tactile stimuli (Fig. 3A, cells 3,4; Suppl. Fig. S5F,G).  
230 The lack of bimodal activation is likely not a consequence of the neurons' low probability of  
231 activation. Assuming independent sampling, taking the number of responsive cells and sample  
232 size into account, the mean number of bimodal neurons expected is  $6.9 \pm 2.6$  (mean  $\pm$  s.d.) and  
233 the probability of no activation is less than one in one thousand ( $p < 9.6e-4$ ). The lack of  
234 bimodal activation is likely not a consequence of the specific visual stimulus tested. Similar  
235 results were obtained in a separate group of mice using prolonged visual stimuli that covered a  
236 broad range of spatiotemporal frequencies and orientations (Suppl. Fig. S6) ( $n = 3$  animals).  
237 Tactile neurons showed no activation to the broad range of visual stimuli (Suppl. Fig. S6B,D),  
238 providing further evidence of their functional distinct properties.

239

#### 240 **V1 Activity on the Treadmill with Diverse Stimuli**

241 Cross-modal tactile activity could either be indiscriminate or tuned to specific tactile inputs  
242 encoding specific information about the stimuli in the tactile environment. To distinguish  
243 between these possibilities, we examined, in a separate group of animals ( $n = 4$  mice), activity  
244 of layer 2/3 neurons while animals ran in a feature-rich tactile environment composed of strips of  
245 material of different heights and orientations placed at distinct treadmill locations (Fig. 4A;  
246 Suppl. Fig. S2D; see Experimental Procedures, Experiment 3). The 1-sec visual stimulus was  
247 presented as the animal ran across four distinct locations on the treadmill. No visual stimulus  
248 was presented during stationary epochs. To cast a wide net for cells that encode tactile  
249 information, we selected cells that showed repeated position-related activity patterns across  
250 trials (EV position  $> 10\%$ , two-fold cross-validation, see Experimental Procedures) (Fig. 4C)  
251 excluding cells that showed responses to the visual stimulus (EV visual stim.  $\leq 0\%$ , two-fold  
252 cross-validation) (Figs 1–3). There was a general association between tactile stimuli on the belt  
253 and the number of V1 neurons that met these criteria (Fig. 4H). We therefore henceforth refer to  
254 these neurons as 'tactile' or 'putative tactile'.

255



256 To study the diversity of V1 tactile activity, we examined the calcium time courses of a total of  
257 1,878 V1 layer 2/3 neurons ( $n = 4$  animals) on the treadmill with diverse stimuli. We followed  
258 through on the 1,345 cells that showed calcium transients in over 25 % of laps (transients larger  
259 than baseline raw  $dF/F_0 + 3$ -times s.d.) excluding the remainder from further analysis. To  
260 examine the tuning of the activity, calcium time courses were deconvolved and expressed as a  
261 function of treadmill location, divided in 1-cm intervals.

262

263 About a quarter of active neurons ( $n = 353/1,345$  cells) showed position-related responses (Fig.  
264 4C, blue traces; EV position  $> 10\%$ , EV visual stim.  $\leq 0\%$ , Fig. 4D,E) consistent with the  
265 activity of tactile neurons (Figs 1–3). This fraction of cells was on par with the fraction of cells  
266 entrained by the visual stimulus presented simultaneously as the animal ran on the treadmill  
267 with diverse stimuli (28 %,  $n = 378/1,345$  cells, including responses locked to visual stimulus  
268 onset and offset) (Fig. 4B, red traces; EV visual stim.  $> 10\%$ ) (Suppl. Fig. S7B,C). However, the  
269 fraction was two to several-fold larger than the fraction observed on treadmills with fewer tactile  
270 stimuli including the treadmill devoid of purposefully salient stimuli (Fig. 4H). These putative  
271 tactile neurons showed robust activity showing calcium transients of similar amplitudes as  
272 visually-responsive cells (tactile  $dF/F_0: 71.9 \pm 61.4\%$ , visual  $dF/F_0: 69.8 \pm 59.9.0\%$ , mean  $\pm$   
273 s.d.; transients larger than 3-times s.d. above baseline  $dF/F_0$ ). The neurons showed similar  
274 activity levels during locomotion and stationary epochs (Fig. 4G). However, they were more  
275 active during stationary epochs than the visually-responsive cells (Fig. 4F, compare with Fig.  
276 4G, no visual stimuli were presented during stationary epochs),

277

278 Far from indiscriminate, however, tactile activity was diversely tuned, with different neurons  
279 showing activity at specific locations in the tactile environment. Simultaneously imaged neurons  
280 showed distinct activity time courses (Fig. 4C, blue traces) and position-related activity patterns  
281 (Fig. 5A,B). Within a same imaging experiment, patterns with sharp and narrow-peak tuning to  
282 different locations were observed simultaneously with patterns showing more gradual activity  
283 changes with belt location. The patterns were repeatable. The average position-related activity  
284 across laps explained up to 50% of the variance in the single-trial data (EV position:  $15.7 \pm 10.9$   
285 %, mean  $\pm$  s.d., two-fold cross-validation) ( $n = 353/1,345$  cells) (Fig. 4E). The cross-correlation  
286 of activity across laps often showed a narrow peak of a few centimetres in width ( $8.2 \pm 2.9$  cm,  
287 half-width at half-maximum, mean  $\pm$  s.d.) (Fig. 5C). Across the population, nonvisual neurons

288 showed location selectivity and position preferences that were distributed over the length of the  
289 treadmill belt (Fig. 5D).

290

291 While correlated with location, the activity of V1 tactile neurons did not bear the features of a  
292 place code (Suppl. Fig. S8). The activity of individual neurons showed considerable redundancy  
293 in time and space (Suppl. Fig. S8A,B). This high redundancy differs markedly from the sparse  
294 activity of hippocampal CA1 neurons measured during the same task ( $n = 3$  animals) (Mao et  
295 al., 2017) (Suppl. Fig. S8C,D). During locomotion on the treadmill with diverse stimuli,  
296 hippocampal place cells showed low probability of activation (Suppl. Fig. S8C), sequential  
297 activation during movement (Suppl. Fig. S8C), and spatially-localized firing fields uniformly  
298 distributed over the treadmill (Suppl. Fig. S8D).

299

300 By comparison, V1 neurons showing tactile-like activity responded at multiple locations (Suppl.  
301 Fig. S8A,B) and showed no indication of sequential activation of V1 neurons during movement  
302 (Suppl. Fig. S8A). Furthermore, while robust hippocampal place cell activity was observed in  
303 absence of tactile stimuli (Suppl. Fig. S8E), the V1 neurons showed little spatial modulations of  
304 their activity on treadmills devoid of tactile stimuli (Fig. 4H). These properties are consistent with  
305 V1 neurons activity encoding low-level sensory features of the tactile environment.

306

307 We conclude that, rather than showing indiscriminate responses to tactile stimuli, V1 nonvisual  
308 neurons have diversely tuned response properties potentially encoding specific information  
309 about the tactile environment.

310

### 311 **Modulations of Visual Responses by Tactile Context**

312 Do tactile inputs sensed by the whiskers also influence V1 visual activity? While we found no  
313 indication of activation by tactile stimuli in visually-responsive cells (Figs 3–5), the neurons may  
314 receive subthreshold inputs that could influence responses to visual stimulation. To test for this  
315 possibility, we examined how responses to the repeated visual stimulus change as animals run  
316 across distinct sets of stimuli on the treadmill with diverse tactile stimuli (Fig. 6, same data as  
317 Figs 4,5). To study modulations across layers of V1, we complemented the layer 2/3 cellular  
318 imaging data ( $n = 4 + 3$  mice) with acute single-unit electrophysiological recordings with  
319 multisite silicon probes in the same task ( $n = 5$  animals).

320 Concomitant to the pronounced nonvisual activity (Figs 4C, 5B,C), V1 neurons showed marked  
321 trial-to-trial variability of visual responses during locomotion on the treadmill with diverse stimuli  
322 (Fig. 4B). In the cellular imaging data, variability was often not shared between simultaneously  
323 imaged neurons (Fig. 4B). In both cellular imaging data and acute recordings, variability was  
324 often linked to the location of visual stimulus onset (Fig. 6A; Suppl. Fig. S9A). To quantify these  
325 modulations, we sorted responses by treadmill location of stimulus onsets and averaged them  
326 across trials (Fig. 6A; Suppl. Fig. S9A). We focused on the three locations away from the reward  
327 site which had comparable pupil size, movement speed and eye position (Fig. 6B; Suppl. Fig.  
328 S9A). We computed for each cell a modulation index (MI) and effect size (ES), providing  
329 measures of the magnitude of the modulation and its difference in mean to the position-shuffled  
330 data (Suppl. Fig. S9B) (see Experimental Procedures). We excluded responses to the stimulus  
331 presented at the reward site which showed correlated eye movements and changes in  
332 movement speed (Suppl. Fig. S9A). Cellular imaging calcium time courses was deconvolved to  
333 estimate firing rates.

334  
335 Although simultaneously imaged neurons responded, on average, similarly across the three  
336 locations (Fig. 6A, bottom), a subset showed pronounced and diverse activity differences across  
337 the three locations (Fig. 6A, cells 1 to 8). These differences were observed although pupil size  
338 and movement speed were similar at those locations (Fig. 6B; Suppl. Fig. S9A). Over two thirds  
339 of visually-responsive cells in layer 2/3 measured with cellular imaging showed clear location  
340 modulations (81 %,  $n = 306/378$  cells in 4 animals,  $ES > 1$ ) (Fig. 6E; Suppl. Fig. S9C). The  
341 neurons showed an average modulation index of  $14.6 \pm 13.9$  % (mean  $\pm$  s.d.,  $n = 378$  cells).  
342 Modulations by location were also observed in the electrophysiological recordings across layers,  
343 with two third of the cells showing modulations with an effect size  $> 1$  (Fig. 6C; Suppl. Fig. S9D)  
344 (67 %,  $n = 98/146$  cells in 5 animals,  $ES > 1$ ). The average modulation index in the recordings  
345 across layers was  $9.2 \pm 7.3$  % (mean  $\pm$  s.d.,  $n = 146$  cells). Interestingly, modulations were  
346 observed at all depths of V1 (Fig. 6D).

347  
348 To test whether modulations reflect behavioural variables correlated with location, we computed  
349 the Pearson correlation coefficient between the responses and behavioural variables over the  
350 time scale of the visual stimulus (Suppl. Fig. S9E,G). We considered movement speed (Suppl.  
351 Fig. S9E, top; S9G, left), interval between visual stimulus events (visual stimulation rate, Suppl.

352 Fig. S9E, middle; Suppl. Fig. S9G, right), and eye position (Suppl. Fig. S9E, bottom). The  
353 neurons' behavioural activity correlations were largely statistically independent from modulation  
354 indices, as evidenced by their separable joint histograms (Suppl. Fig. S9E,G). This held for  
355 electrophysiological recordings (Suppl. Fig. S9E) and the calcium imaging data (Suppl. Fig.  
356 S9E). One exception was movement speed, whereby highest correlated cells showed lower  
357 modulations. This was not observed in the spike recordings (Suppl. Fig. S9E, top). To test the  
358 impact of time spent at reward on modulations, we compared modulation indices across the  
359 slowest and fastest laps in the experiments measured around the reward site (bottom vs. top 25  
360 % of trials) but found that it had weak impact on magnitude of modulations and effect size  
361 (Suppl. Fig. S9F). These results suggest that it is unlikely that location modulations of visual  
362 responses reflect correlations of behavioural variables with location.

363  
364 To directly test the role of tactile stimuli on the belt, we imaged, in a separate group of animals  
365 ( $n = 3$  mice), location modulation of visual responses in consecutive blocks of trials in presence  
366 of the barrier preventing access of the whiskers to tactile stimuli. Neurons showed weaker  
367 modulations in the presence of the barrier, with a mean modulation index of  $19.1 \pm 2.1$  % (mean  
368  $\pm$  s.e.m., barrier placed,  $n = 83$  cells) and  $35.6 \pm 4.6$  % (mean  $\pm$  s.e.m., barrier absent,  $p < 9.0e-$   
369  $4$ , 1-way ANOVA) and mean effect size of  $1.5 \pm 0.14$  (mean  $\pm$  s.e.m., barrier placed) and  $2.3 \pm$   
370  $0.15$  (barrier absent,  $p < 3.0e-4$ ) (Fig. 6F).

371  
372 Thus, during locomotion on the treadmill with diverse stimuli, V1 neurons show location-related  
373 modulations of visual responses that likely reflect tactile context.

374

375

## 376 **DISCUSSION**

377 We used a head-fixed active whisking and locomotion assay with controlled sensory stimuli to  
378 study contextual modulations by tactile inputs in the mouse primary visual cortex during  
379 behaviour. We found that during locomotion and exploration mouse V1 neurons encode rich  
380 information about tactile environment, encoding somatosensory inputs from the whiskers and  
381 partaking in visuo-tactile integration. These results indicate that mouse V1 encodes functionally  
382 diverse cross-modal signals during real-world behaviour.

383

384 We observed activation of mouse V1 layer 2/3 neurons by tactile stimuli (Figs 1–5) as well as  
385 modulations of visual responses by tactile context (Fig. 6). The tactile activity resembled the  
386 responses of neurons in the S1 barrel field of the somatosensory cortex (Suppl. Fig. S3), was  
387 observed both in darkness and under photopic illumination, and was disrupted by a barrier  
388 placed between the whiskers and the stimuli (Figs 1,2). Interestingly, the activity was carried by  
389 a cell population that show little responses to visual stimuli (Figs 3,4; Suppl. Fig. S6). This raises  
390 the interesting possibility that the neurons form a functionally distinct cell type. The responses  
391 were diverse and tuned to features and locations in the tactile environment (Figs 4,5).

392

### 393 **Cross-Modal Activity in Primary Visual Cortex**

394 Prior to this study, cellular level evidence of cross-modal activity in the rodent visual cortex  
395 stemmed primarily from electrical recordings of neuronal responses to passive stimulation  
396 (Bieler et al., 2017; Ibrahim et al., 2016; Iurilli et al., 2012; Newton et al., 2002; Wallace et al.,  
397 2004). These studies concluded that, in intact animals, cross-modal stimulation induces  
398 subthreshold inputs and modulates visual responses but seldom leads to neuronal activation  
399 without inputs from the primary sensory modality. A study of auditory stimulation (Ibrahim et al.,  
400 2016) reported activation of layer 1 inhibitory neurons but only modulations in layer 2/3 neurons.  
401 These studies used single or a few stimuli and could not address the degree to which V1  
402 neurons encode diverse information about the cross-sensory modality. One study in freely  
403 moving rats (Vasconcelos et al., 2011) showed, in darkness, V1 activity linked to location and  
404 objects as well as modulations correlated with tactile discrimination behaviour. This study,  
405 however, could not distinguish between sensory or motor influences on V1 activity and did not  
406 investigate the tuning of individual V1 neurons.

407

408 A number of factors might have contributed to our observation of neuronal activation in  
409 response to tactile stimuli. First and foremost is the cellular imaging which has high yield and  
410 sensitivity and allows investigation of sparse firing patterns that could easily be overlooked with  
411 electrical recordings techniques. Our findings could be also influenced by the elevated  
412 excitability of V1 neurons during treadmill locomotion, which is associated with elevated arousal.  
413 However, a study in head-fixed mice reported similar subthreshold cross-modal responses to  
414 auditory stimulation during anaesthesia, wakefulness and movement (Iurilli et al., 2012).  
415 Accordingly, we observed similar levels of activity in tactile V1 neurons during locomotion and

416 stationary epochs (Fig. 4G). A third factor could be the active whisking paradigm.  
417 Somatosensory responses in S1 during active whisking are stronger and longer lasting than  
418 during passive stimulation (Krupa et al., 2004).

419

### 420 **Function of V1 Tactile Signals**

421 Our results indicate that diverse tactile signals are represented at the level of neuronal  
422 populations within mouse V1. The function of these signals remains to be elucidated.  
423 Convergence of complementary inputs from the eyes and the whiskers suggests integration of  
424 information from the animals' proximal tactile environment. This may be useful in exploratory or  
425 navigation behaviours such as object exploration (Vasconcelos et al., 2011) or obstacle  
426 avoidance (Sofroniew et al., 2014). While we observed no multimodal activity that would support  
427 multisensory associations, the modulations may serve contextualisation of visual inputs.

428

429 While correlated with location on the linear treadmill, the activity comprised the properties of a  
430 low-level sensory code. The activity was concentrated at the tactile stimuli (Figs 1–3, 5H) and  
431 had limited spatial selectivity (Fig. 5E, Suppl. Fig. S8A,B), with individual neurons responding at  
432 different times and showing responses at multiple locations during locomotion on the treadmill  
433 with diverse stimuli. This activity differs strikingly from the sparse and spatially localized activity  
434 we observed in hippocampus (Suppl. Fig. S8C,D) and in retrosplenial cortex (Mao et al., 2017)  
435 during the same task. We speculate that the diversity of the activity (Figs 4,5) reflects distinct  
436 whiskers brushing different tactile stimuli. Our experiments, however, do not rule out a  
437 contribution of stereotyped whisking patterns in generating the activity. Importantly, we note that  
438 position-related patterns provide only a lower bound on diversity and ignore the rich temporal  
439 dynamics of tactile activity (Suppl. Fig. S4). Understanding the precise whisker movements and  
440 touch patterns that lead to V1 tactile responses requires future investigation.

441

### 442 **Origins of V1 Tactile Signals**

443 The anatomical origins of V1 tactile signals are unknown. The activity could originate in long-  
444 range cortical inputs from S1 barrel field (Charbonneau et al., 2012; Kim et al., 2015; Masse et  
445 al., 2016; Stehberg et al., 2014; Van Brussel et al., 2011). Anterior visual cortical areas A and  
446 RL of the posterior parietal cortex are also interconnected with S1 barrel field (Wang et al.,  
447 2012). Neurons in area RL have been shown to respond to both visual and tactile stimulation



448 (Olcese et al., 2013). Neurons in these areas could send tactile information directly to V1 or  
449 relay tactile signals through any one of the higher visual cortical areas projecting to V1.

450

#### 451 **Relation to Cross-Modal Plasticity**

452 There is a striking parallel between our results and the cross-modal plasticity that occurs in V1  
453 following the loss of visual inputs (Amedi et al., 2010; Klinge et al., 2010; Lee and Whitt, 2015;  
454 Merabet et al., 2007; Sathian, 2005). Human neuroimaging studies have shown V1 activation in  
455 blind subjects during braille reading and other tactile paradigms (Merabet et al., 2007; Sadato et  
456 al., 1996). Cross-modal activity in V1 is also observed after short-term visual deprivation and is  
457 causally linked to tactile behaviour (Merabet et al., 2008; Merabet et al., 2007). In rodents,  
458 recovery of activity from loss of visual inputs depends on the inputs from the whiskers (Newton  
459 et al., 2002; Van Brussel et al., 2011). Following loss of visual inputs, the tactile activity we  
460 observe in intact animals may be amplified, which could explain the whisker-dependent,  
461 progressive recovery of activity in V1 that is observed weeks after removal of visual inputs.

462

463

#### 464 **SUPPLEMENTAL INFORMATION**

465 Supplemental Information includes nine figures.

466

#### 467 **AUTHOR CONTRIBUTIONS**

468 S.K., D.M., B.L.M and V.B. designed the experiments. D.M. and S.K. devised the behavioural  
469 assay. S.K. performed the experiments in the visual cortex. D.M. performed the dual recordings  
470 in cortex and hippocampus and the imaging in the hippocampus. S.K. and D.M. analysed the  
471 data with guidance from V.B. S.K. and V.B. wrote the manuscript with input from D.M. and  
472 B.L.M. The authors declare no competing interests.

473

#### 474 **ACKNOWLEDGEMENTS**

475 We are grateful to Karel Svoboda, Judith Hirsch, Georg Keller, Thomas Mrsic-Flogel, Mark L.  
476 Andermann, Karl Farrow, Fabian Kloosterman, João Couto, Michał Ślęzak, and all members of  
477 the Bonin laboratory for feedback, discussions and comments on the manuscript. João Couto  
478 acquired the cellular imaging data set in the somatosensory cortex. Anna Pitas, Çağatay Aydın,  
479 and Xu Han assisted in experiments. Thanks to Molly J. Kirk and Alexandra Emmendorfer for



480 surgical help. We thank Adrienne Caiado, Jordyn Hanover, Jake T. Jordan, Jessica Mitchell,  
481 Frederique Ooms, Ben Puccio, and Daniel Tovbin for animal training. We thank Adrian Cheng  
482 for technical advice with the two-photon microscopes. This work was supported by Neuro-  
483 Electronics Research Flanders (B.L.M. and V.B.), AIHS Polaris award (B.L.M.), AIHS graduate  
484 studentship (D.M.), NSERC funding (B.L.M.), NSF grant 1631465 (B.L.M.), Research  
485 Foundation—Flanders (FWO) grant G0D0516N (V.B.), and KU Leuven Research Council grant  
486 C14/16/048 (V.B.).

487

488

## 489 REFERENCES

- 490 Amedi, A., Raz, N., Azulay, H., Malach, R., and Zohary, E. (2010). Cortical activity during tactile  
491 exploration of objects in blind and sighted humans. *Restor Neurol Neurosci* *28*, 143-156.
- 492 Bieler, M., Sieben, K., Schildt, S., Roder, B., and Hanganu-Opatz, I.L. (2017). Visual-tactile processing in  
493 primary somatosensory cortex emerges before cross-modal experience. *Synapse* *71*.
- 494 Bizley, J.K., Nodal, F.R., Bajo, V.M., Nelken, I., and King, A.J. (2007). Physiological and anatomical  
495 evidence for multisensory interactions in auditory cortex. *Cereb Cortex* *17*, 2172-2189.
- 496 Bonin, V., Histed, M.H., Yurgenson, S., and Reid, R.C. (2011). Local diversity and fine-scale organization  
497 of receptive fields in mouse visual cortex. *J Neurosci* *31*, 18506-18521.
- 498 Charbonneau, V., Laramée, M.E., Boucher, V., Bronchti, G., and Boire, D. (2012). Cortical and  
499 subcortical projections to primary visual cortex in anophthalmic, enucleated and sighted mice.  
500 *Eur J Neurosci* *36*, 2949-2963.
- 501 Chen, T.W., Wardill, T.J., Sun, Y., Pulver, S.R., Renninger, S.L., Baohan, A., Schreiter, E.R., Kerr, R.A.,  
502 Orger, M.B., Jayaraman, V., *et al.* (2013). Ultrasensitive fluorescent proteins for imaging  
503 neuronal activity. *Nature* *499*, 295-300.
- 504 Dana, H., Chen, T.W., Hu, A., Shields, B.C., Guo, C., Looger, L.L., Kim, D.S., and Svoboda, K. (2014).  
505 Thy1-GCaMP6 transgenic mice for neuronal population imaging in vivo. *PLoS ONE* *9*, e108697.
- 506 De Meo, R., Murray, M.M., Clarke, S., and Matusz, P.J. (2015). Top-down control and early multisensory  
507 processes: chicken vs. egg. *Front Integr Neurosci* *9*, 17.
- 508 Driver, J., and Noesselt, T. (2008). Multisensory interplay reveals crossmodal influences on 'sensory-  
509 specific' brain regions, neural responses, and judgments. *Neuron* *57*, 11-23.
- 510 Falchier, A., Clavagnier, S., Barone, P., and Kennedy, H. (2002). Anatomical evidence of multimodal  
511 integration in primate striate cortex. *J Neurosci* *22*, 5749-5759.
- 512 Ghazanfar, A.A., and Schroeder, C.E. (2006). Is neocortex essentially multisensory? *Trends in cognitive*  
513 *sciences* *10*, 278-285.
- 514 Goldey, G.J., Roumis, D.K., Glickfeld, L.L., Kerlin, A.M., Reid, R.C., Bonin, V., Schafer, D.P., and  
515 Andermann, M.L. (2014). Removable cranial windows for long-term imaging in awake mice. *Nat*  
516 *Protoc* *9*, 2515-2538.
- 517 Gothard, K.M., Skaggs, W.E., and McNaughton, B.L. (1996). Dynamics of mismatch correction in the  
518 hippocampal ensemble code for space: interaction between path integration and environmental  
519 cues. *J Neurosci* *16*, 8027-8040.

- 520 Guipponi, O., Clery, J., Odouard, S., Wardak, C., and Ben Hamed, S. (2015). Whole brain mapping of  
521 visual and tactile convergence in the macaque monkey. *Neuroimage* *117*, 93-102.
- 522 Haggerty, D.C., and Ji, D. (2015). Activities of visual cortical and hippocampal neurons co-fluctuate in  
523 freely moving rats during spatial behavior. *Elife* *4*.
- 524 Hazan, L., Zugaro, M., and Buzsaki, G. (2006). Klusters, NeuroScope, NDManager: a free software suite  
525 for neurophysiological data processing and visualization. *J Neurosci Methods* *155*, 207-216.
- 526 Ibrahim, L.A., Mesik, L., Ji, X.Y., Fang, Q., Li, H.F., Li, Y.T., Zingg, B., Zhang, L.I., and Tao, H.W. (2016).  
527 Cross-Modality Sharpening of Visual Cortical Processing through Layer-1-Mediated Inhibition  
528 and Disinhibition. *Neuron* *89*, 1031-1045.
- 529 Iurilli, G., Ghezzi, D., Olcese, U., Lassi, G., Nazzaro, C., Tonini, R., Tucci, V., Benfenati, F., and Medini,  
530 P. (2012). Sound-driven synaptic inhibition in primary visual cortex. *Neuron* *73*, 814-828.
- 531 Jenks, R.A., Vaziri, A., Boloori, A.R., and Stanley, G.B. (2010). Self-motion and the shaping of sensory  
532 signals. *J Neurophysiol* *103*, 2195-2207.
- 533 Ji, D., and Wilson, M.A. (2007). Coordinated memory replay in the visual cortex and hippocampus during  
534 sleep. *Nat Neurosci* *10*, 100-107.
- 535 Kadir, S.N., Goodman, D.F., and Harris, K.D. (2014). High-dimensional cluster analysis with the masked  
536 EM algorithm. *Neural Comput* *26*, 2379-2394.
- 537 Kayser, C., Petkov, C.I., and Logothetis, N.K. (2008). Visual modulation of neurons in auditory cortex.  
538 *Cereb Cortex* *18*, 1560-1574.
- 539 Kayser, C., Petkov, C.I., and Logothetis, N.K. (2009). Multisensory interactions in primate auditory cortex:  
540 fMRI and electrophysiology. *Hear Res* *258*, 80-88.
- 541 Kim, E.J., Juavinett, A.L., Kyubwa, E.M., Jacobs, M.W., and Callaway, E.M. (2015). Three Types of  
542 Cortical Layer 5 Neurons That Differ in Brain-wide Connectivity and Function. *Neuron* *88*, 1253-  
543 1267.
- 544 Kleinfeld, D., Ahissar, E., and Diamond, M.E. (2006). Active sensation: insights from the rodent vibrissa  
545 sensorimotor system. *Curr Opin Neurobiol* *16*, 435-444.
- 546 Klinge, C., Eippert, F., Roder, B., and Buchel, C. (2010). Corticocortical connections mediate primary  
547 visual cortex responses to auditory stimulation in the blind. *J Neurosci* *30*, 12798-12805.
- 548 Krupa, D.J., Wiest, M.C., Shuler, M.G., Laubach, M., and Nicolelis, M.A. (2004). Layer-specific  
549 somatosensory cortical activation during active tactile discrimination. *Science* *304*, 1989-1992.
- 550 Lakatos, P., O'Connell, M.N., Barczak, A., Mills, A., Javitt, D.C., and Schroeder, C.E. (2009). The leading  
551 sense: supramodal control of neurophysiological context by attention. *Neuron* *64*, 419-430.
- 552 Lee, H.K., and Whitt, J.L. (2015). Cross-modal synaptic plasticity in adult primary sensory cortices. *Curr*  
553 *Opin Neurobiol* *35*, 119-126.
- 554 Mao, D., Kandler, S., McNaughton, B.L., and Bonin, V. (2017). Sparse orthogonal population  
555 representation of spatial context in the retrosplenial cortex. *Nat Commun* *8*, 243.
- 556 Masse, I.O., Ross, S., Bronchti, G., and Boire, D. (2016). Asymmetric Direct Reciprocal Connections  
557 Between Primary Visual and Somatosensory Cortices of the Mouse. *Cereb Cortex*.
- 558 Merabet, L.B., Hamilton, R., Schlaug, G., Swisher, J.D., Kiriakopoulos, E.T., Pitskel, N.B., Kauffman, T.,  
559 and Pascual-Leone, A. (2008). Rapid and reversible recruitment of early visual cortex for touch.  
560 *PLoS ONE* *3*, e3046.
- 561 Merabet, L.B., and Pascual-Leone, A. (2010). Neural reorganization following sensory loss: the  
562 opportunity of change. *Nat Rev Neurosci* *11*, 44-52.

- 563 Merabet, L.B., Swisher, J.D., McMains, S.A., Halko, M.A., Amedi, A., Pascual-Leone, A., and Somers,  
564 D.C. (2007). Combined activation and deactivation of visual cortex during tactile sensory  
565 processing. *J Neurophysiol* *97*, 1633-1641.
- 566 Murray, M.M., Thelen, A., Thut, G., Romei, V., Martuzzi, R., and Matusz, P.J. (2015). The multisensory  
567 function of the human primary visual cortex. *Neuropsychologia*.
- 568 Newton, J.R., Sikes, R.W., and Skavenski, A.A. (2002). Cross-modal plasticity after monocular  
569 enucleation of the adult rabbit. *Exp Brain Res* *144*, 423-429.
- 570 Niell, C.M., and Stryker, M.P. (2008). Highly selective receptive fields in mouse visual cortex. *J Neurosci*  
571 *28*, 7520-7536.
- 572 Olcese, U., Iurilli, G., and Medini, P. (2013). Cellular and synaptic architecture of multisensory integration  
573 in the mouse neocortex. *Neuron* *79*, 579-593.
- 574 Pascual-Leone, A., Amedi, A., Fregni, F., and Merabet, L.B. (2005). The plastic human brain cortex. *Annu*  
575 *Rev Neurosci* *28*, 377-401.
- 576 Rockland, K.S., and Ojima, H. (2003). Multisensory convergence in calcarine visual areas in macaque  
577 monkey. *Int J Psychophysiol* *50*, 19-26.
- 578 Royer, S., Zemelman, B.V., Losonczy, A., Kim, J., Chance, F., Magee, J.C., and Buzsaki, G. (2012).  
579 Control of timing, rate and bursts of hippocampal place cells by dendritic and somatic inhibition.  
580 *Nat Neurosci* *15*, 769-775.
- 581 Sadato, N., Pascual-Leone, A., Grafman, J., Ibanez, V., Deiber, M.P., Dold, G., and Hallett, M. (1996).  
582 Activation of the primary visual cortex by Braille reading in blind subjects. *Nature* *380*, 526-528.
- 583 Sathian, K. (2005). Visual cortical activity during tactile perception in the sighted and the visually  
584 deprived. *Dev Psychobiol* *46*, 279-286.
- 585 Sathian, K., and Zangaladze, A. (2002). Feeling with the mind's eye: contribution of visual cortex to tactile  
586 perception. *Behav Brain Res* *135*, 127-132.
- 587 Schroeder, C.E., and Foxe, J. (2005). Multisensory contributions to low-level, 'unisensory' processing.  
588 *Curr Opin Neurobiol* *15*, 454-458.
- 589 Smith, S.L., and Hausser, M. (2010). Parallel processing of visual space by neighboring neurons in  
590 mouse visual cortex. *Nat Neurosci* *13*, 1144-1149.
- 591 Sofroniew, N.J., Cohen, J.D., Lee, A.K., and Svoboda, K. (2014). Natural whisker-guided behavior by  
592 head-fixed mice in tactile virtual reality. *J Neurosci* *34*, 9537-9550.
- 593 Stehberg, J., Dang, P.T., and Frostig, R.D. (2014). Unimodal primary sensory cortices are directly  
594 connected by long-range horizontal projections in the rat sensory cortex. *Front Neuroanat* *8*, 93.
- 595 Stein, B.E., and Stanford, T.R. (2008). Multisensory integration: current issues from the perspective of the  
596 single neuron. *Nat Rev Neurosci* *9*, 255-266.
- 597 Terrazas, A., Krause, M., Lipa, P., Gothard, K.M., Barnes, C.A., and McNaughton, B.L. (2005). Self-  
598 motion and the hippocampal spatial metric. *J Neurosci* *25*, 8085-8096.
- 599 Thevenaz, P., Ruttimann, U.E., and Unser, M. (1998). A pyramid approach to subpixel registration based  
600 on intensity. *IEEE Trans Image Process* *7*, 27-41.
- 601 Van Brussel, L., Gerits, A., and Arckens, L. (2011). Evidence for cross-modal plasticity in adult mouse  
602 visual cortex following monocular enucleation. *Cereb Cortex* *21*, 2133-2146.
- 603 Vasconcelos, N., Pantoja, J., Belchior, H., Caixeta, F.V., Faber, J., Freire, M.A., Cota, V.R., Anibal de  
604 Macedo, E., Laplagne, D.A., Gomes, H.M., *et al.* (2011). Cross-modal responses in the primary  
605 visual cortex encode complex objects and correlate with tactile discrimination. *Proc Natl Acad*  
606 *Sci U S A* *108*, 15408-15413.

- 607 Vogelstein, J.T., Packer, A.M., Machado, T.A., Sippy, T., Babadi, B., Yuste, R., and Paninski, L. (2010).  
608 Fast nonnegative deconvolution for spike train inference from population calcium imaging. *J*  
609 *Neurophys* *104*, 3691-3704.
- 610 Wallace, M.T., Ramachandran, R., and Stein, B.E. (2004). A revised view of sensory cortical parcellation.  
611 *Proc Natl Acad Sci U S A* *101*, 2167-2172.
- 612 Wang, Q., and Burkhalter, A. (2007). Area map of mouse visual cortex. *J Comp Neurol* *502*, 339-357.
- 613 Wang, Q., Sporns, O., and Burkhalter, A. (2012). Network analysis of corticocortical connections reveals  
614 ventral and dorsal processing streams in mouse visual cortex. *J Neurosci* *32*, 4386-4399.
- 615 Wang, Y., Celebrini, S., Trotter, Y., and Barone, P. (2008). Visuo-auditory interactions in the primary  
616 visual cortex of the behaving monkey: electrophysiological evidence. *BMC Neurosci* *9*, 79.
- 617 Zangaladze, A., Epstein, C.M., Grafton, S.T., and Sathian, K. (1999). Involvement of visual cortex in  
618 tactile discrimination of orientation. *Nature* *401*, 587-590.
- 619

620 **FIGURE LEGENDS**

621

622 **Figure 1. V1 Neurons Show Whisker-Related Responses to Tactile Stimuli**

623 (A) Assay to study multisensory activity in primary visual cortex (V1) of awake mice. Mice run  
624 head-fixed on a 150-cm treadmill while tactile stimuli (blue) are delivered to the whiskers and  
625 visual stimuli (red) to the contralateral eye. A water reward is delivered at the end of each lap.  
626 Cellular activity is measured in monocular V1 layer 2/3 using a two-photon microscope. A shield  
627 (black) blocks the approaching tactile stimuli from eyesight. Treadmill position, movement  
628 speed, eye position and pupil size are monitored. Bottom: A removable barrier placed between  
629 the animals' snout and treadmill belt prevents the whiskers from contacting tactile stimuli.  
630 Bottom right: GCaMP6 labelled neurons in superficial V1 imaged through a cranial window  
631 (scale bar, 20  $\mu\text{m}$ ). See also Suppl. Figs S1A–C, S2, S3.

632 (B) Experiment to identify tactile responsive V1 neurons. Top to bottom: Experiments consist of  
633 three blocks of trials: First, mice run on a belt without tactile stimuli. Subsequently, the belt is  
634 replaced with one containing tactile stimuli (blue, T1, T2), while head-fixation and the microscope  
635 field-of-view are maintained. Tactile stimuli comprise two discrete 10-cm stretches of four thin,  
636 5-mm wide foam strips. Finally, whisker contacts with the stimuli are blocked with a removable  
637 whisker barrier (orange). Experiments are performed without visual stimuli in darkness. See also  
638 Suppl. Figs S1H, S2B.

639 (C) Trial average calcium fluorescence as a function of treadmill position of two simultaneously  
640 imaged V1 L2/3 neurons. These neurons show sharp calcium increases at tactile stimuli  
641 locations (centre, blue) but not in the no-stimulus condition (left). The whisker barrier disrupts  
642 tactile activity (right, yellow) Top: Illustration of treadmill belts. Shaded areas indicate treadmill  
643 position of tactile stimuli. Shaded curves represent s.e.m. computed across trials. Locomotion  
644 behaviour shown below (mean  $\pm$  s.d.; blank: n=69 laps, tactile: n=76 laps, barrier: n=58 laps).  
645 Activity is measured without visual inputs and in darkness ( $< 0.01 \text{ cd/m}^2$ ).

646 (D) Normalized calcium activity of 25 cells with significant responses at tactile stimuli location (1-  
647 way ANOVA,  $p < 0.01$ ) in presence and absence of tactile stimuli. Tactile responses are largely  
648 disrupted by the whisker barrier. Experiments are done in darkness ( $< 0.01 \text{ cd/m}^2$ ).

649 (E) Normalized activity of 112 cells with responses at tactile stimuli location (1-way ANOVA,  $p <$   
650  $0.01$ ) in presence and absence of stimuli. Experiments are done under photopic condition (grey  
651 screen illumination). See also Suppl. Fig. S2B.

652 (F) Cumulative distributions of responses for tactile responsive cells in the three experimental  
653 conditions (no. stim., tactile stim. and barrier) in darkness (solid curves) and in the two  
654 conditions (no stim. and tactile stim.) in photopic conditions (dashed curves). See also Suppl.  
655 Fig. S5A.  
656

Figure 1.

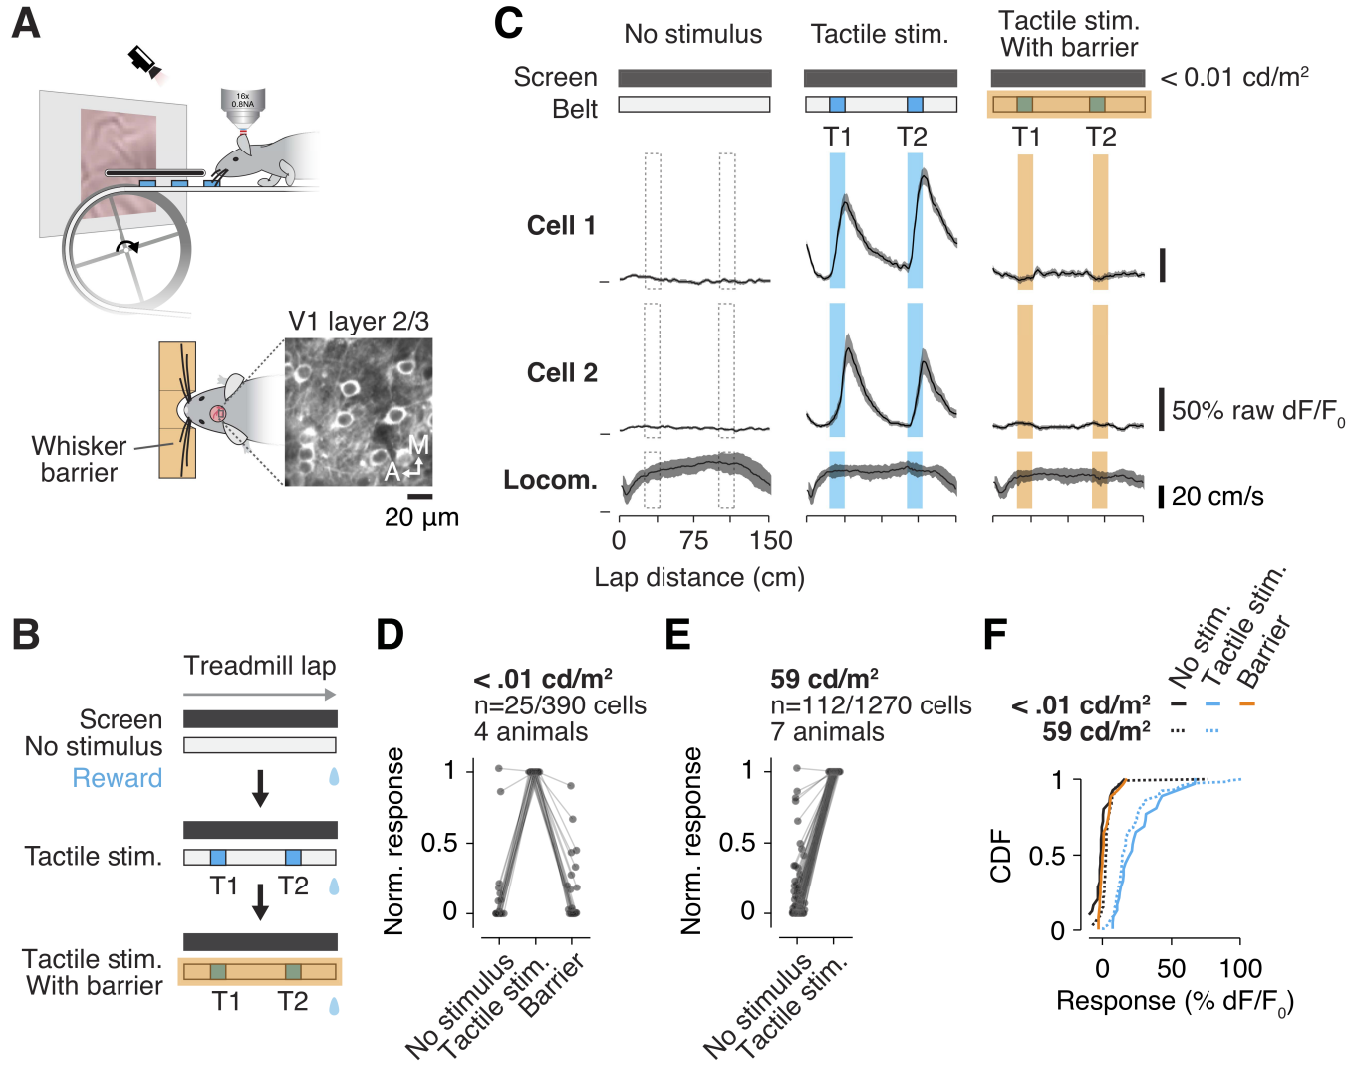



658 **Figure 2. Prior Exposure Is Not Required for V1 Tactile Activity**

659 (A) Trial-to-trial activity of two neurons with and without tactile stimuli and with the whisker  
660 barrier. Top: Block of trials on the treadmill without tactile stimuli. Centre: Block of trials with  
661 stimuli, without the barrier. Bottom: Block of trials with the barrier preventing contacts between  
662 whiskers and tactile stimuli. Note how tactile responses are observed from the first laps on the  
663 treadmill with tactile stimuli (centre) and how they are abolished from the first laps with the  
664 barrier (bottom). For visualization, a subset of the laps is omitted for the no-stimulus condition.  
665 See also Suppl. Fig. S4A.

666 (B) Population quantification of entrainment of activity of cells by tactile stimuli in presence and  
667 absence of the whisker barrier. Note the activity entrainment without stimuli and in presence of  
668 the whisker barrier matches the unresponsive population.

669 (C) Trial-to-trial activity of two V1 neurons in an animal that was never exposed to a treadmill  
670 with tactile stimuli. Top: Block of trials on treadmill without stimuli. Bottom: Block of trials on  
671 treadmill with tactile stimuli. Note how tactile responses are observed from the first laps on the  
672 treadmill with stimuli and how tactile neurons can show haphazard ongoing activity in absence  
673 of tactile stimuli. See also Suppl. Fig. S4B.

674 (D) Trial-to-trial activity of two V1 neurons from an animal with prior experience on a treadmill  
675 with tactile stimuli. Note the lack of activity in absence of tactile stimuli despite prior exposure to  
676 the stimuli. For visualization, a subset of the laps is omitted for the no-stimulus condition. See  
677 also Suppl. Fig. S4C.

678 (E) Cumulative distributions of tactile responding cells for the two experimental conditions (no  
679 stim. and tactile stim.) in naïve (dashed curves) and experienced (solid curves) animals for their  
680 responses (left) and entrainment of activity (right). See also Suppl. Fig. S5B.

681

Figure 2.

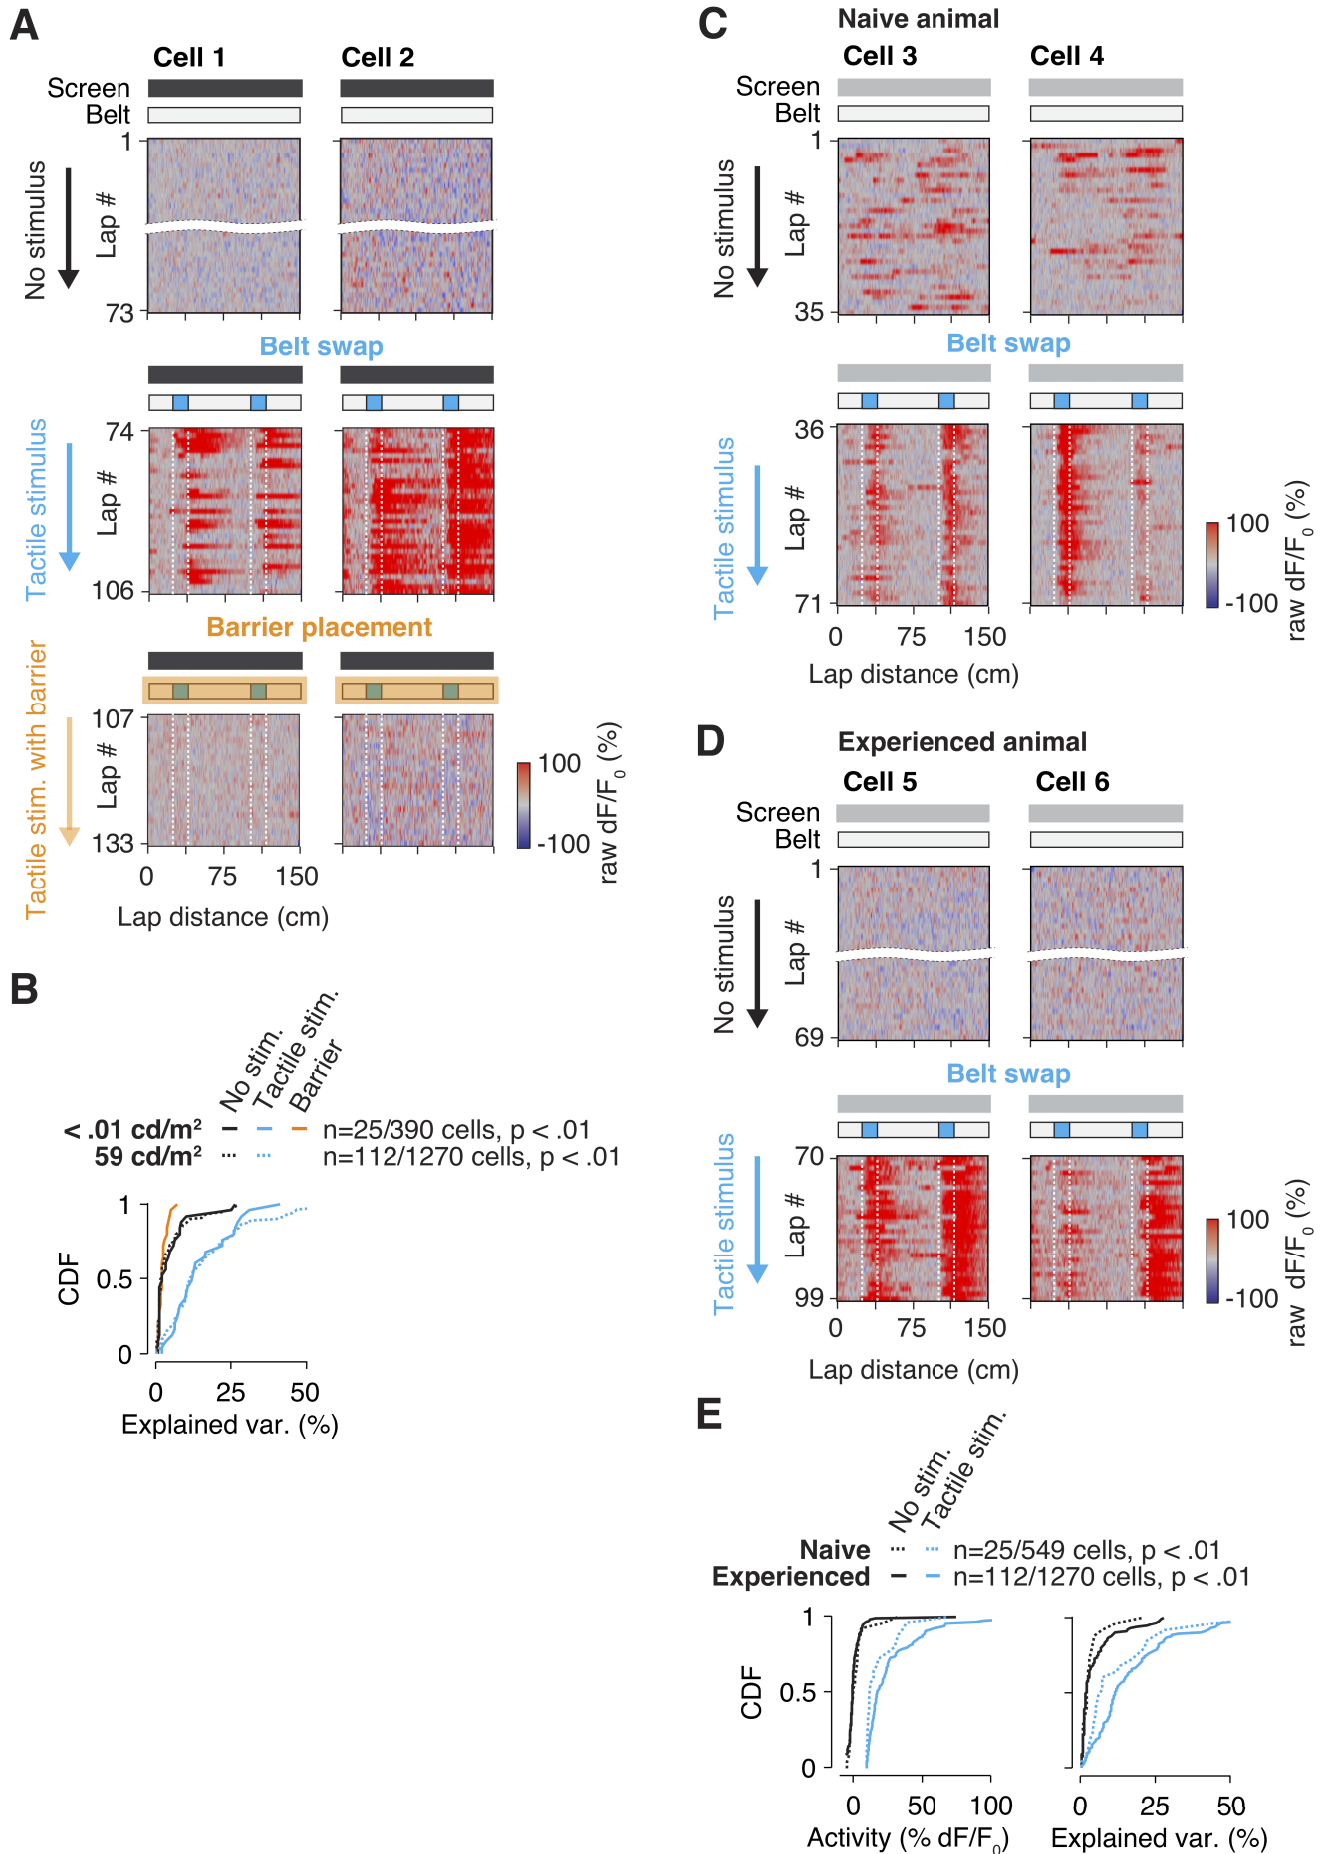

683 **Figure 3. Visual and Tactile Stimuli Activate Non-Overlapping V1 Populations**

684 Experiment demonstrating how visual and tactile stimuli activate distinct populations of V1  
685 neurons.

686 (A) Trial average calcium fluorescence as a function of treadmill position of four V1 L2/3  
687 neurons for a trial block on a treadmill without stimuli (left, n=24 laps), a block with unimodal  
688 tactile stimulation (middle, n=23 laps), and a block with unimodal visual stimulation (right, n=17  
689 laps). Tactile stimuli are as in Fig. 1. The visual stimulus is a 1-sec epoch of noise shown to the  
690 right eye in a 60-by-60 deg. square window with onset triggered by treadmill locations. Cell  
691 activated by tactile stimuli (cells 1,2) do not respond to visual stimulation, and vice versa (cells  
692 3,4). See also Suppl. Figs S5, S6.

693 (B) Scatter plot shows visual vs. tactile responses for sensory responsive (n= 148, dark  
694 markers) and nonresponsive (n = 568, grey markers) L2/3 neurons (1-way ANOVA,  $p < 0.01$ ).  
695 There is a complete dissociation by sensory modality. Visual activity is defined as calcium  
696 activity in 1.5-sec windows after stimulus onset, tactile activity is defined as activity in 2-sec  
697 windows after tactile stimuli.

698 (C) Scatter shows responses normalized to maximum response amplitude during either visual  
699 or tactile stimulation.

700

Figure 3.

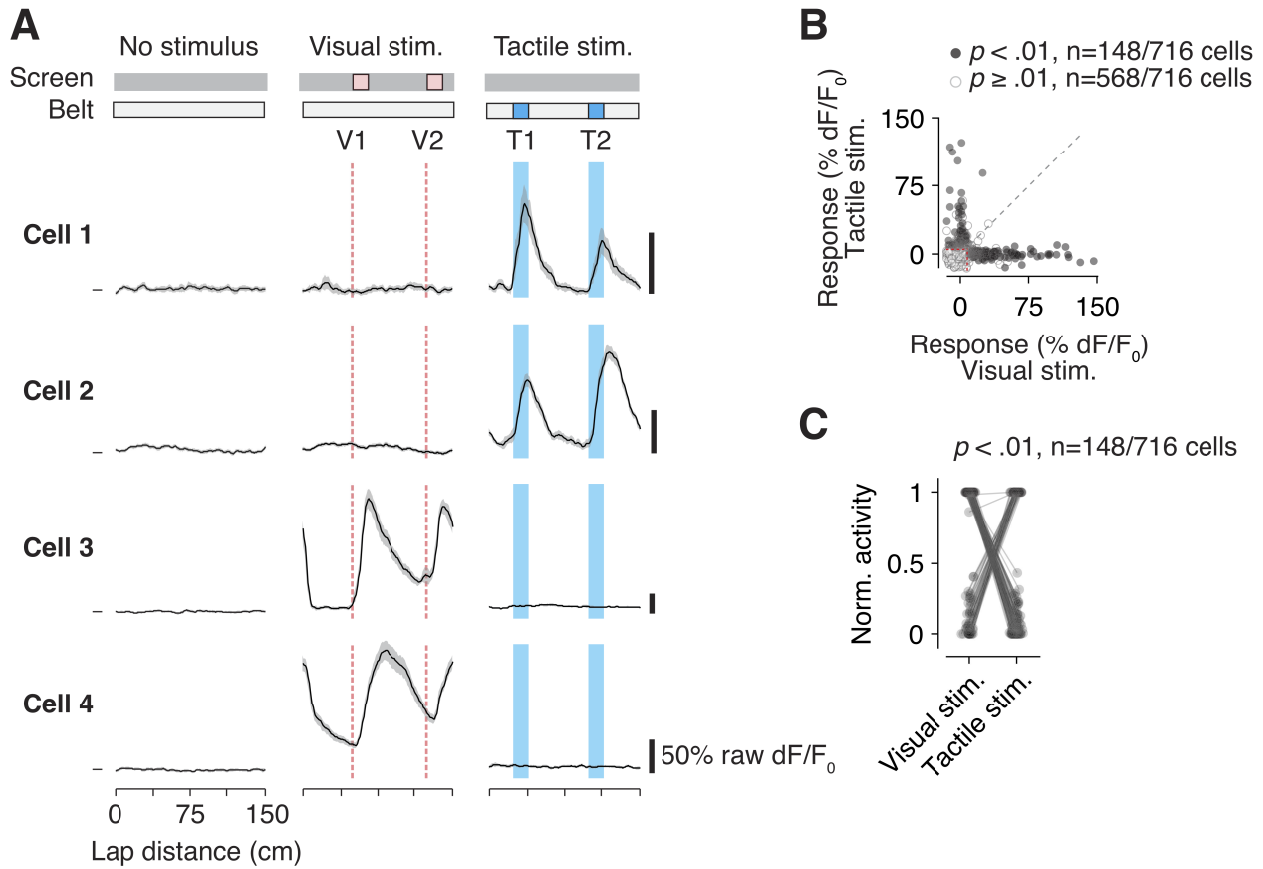

702 **Figure 4. Diversity of Nonvisual V1 Activity in a Feature-Rich Tactile Environment**

703 (A) Experiment to test for interactions between visual and tactile activity. A brief visual stimulus  
704 (top) is presented and diverse tactile stimuli of different heights and spatial configurations  
705 (middle and bottom) are placed at different locations on the treadmill.

706 (B,C) Example calcium time courses of ten simultaneously imaged V1 layer 2/3 neurons  
707 identified as visual (B, cells 1 to 4, red traces) or putative tactile (C, cells 5 to 10, blue traces)  
708 based on explained variance by position and visual stimulation (visual cells: EV visual stim. > 10  
709 %; tactile cells: EV visual stim.  $\leq$  0 % and EV position > 10 %; see Experimental Procedures).

710 (D) Fraction of variance in calcium time courses explained by the visual stimulus. In contrast to  
711 visually neurons (n = 378 cells, red), other cells, including tactile activated neurons (n = 353  
712 cells, blue), show no entrainment of activity by the visual stimulus (EV visual stim.  $\leq$  0 %). Red  
713 and blue markers indicate fraction of explained variance for example neurons in B,C.

714 (E) Fraction of variance in calcium activity explained by position for cells showing tactile activity  
715 (n = 353 cells; EV position > 10 %, EV visual stim.  $\leq$  0 %). Blue markers indicate fraction of  
716 explained variance for example neurons in C.

717 (F) Activity of visual neurons during still (dashed line) and running epochs (solid line). No visual  
718 stimulus is presented during stillness which leads to increased activity during running.

719 (G) Activity of putative tactile neurons during still (dashed line) and running epochs (solid line).  
720 Tactile neurons show similar activity during running and stillness, likely reflecting active whisking  
721 behaviour.

722 (H) Cumulative distribution of activity entrainment by treadmill position for cells imaged on the  
723 belt with diverse tactile stimuli (solid curve, see A), two stimuli (dashed curve, see Fig. 3) and  
724 without tactile stimuli (dotted curve, see Fig. 3). With diverse tactile stimuli, n = 686/1345 cells  
725 pass an EV threshold of 10 %, with two stimuli n = 144/716 cells, and without stimuli n = 38/716  
726 cells. Dashed line indicates EV threshold.

727

Figure 4.

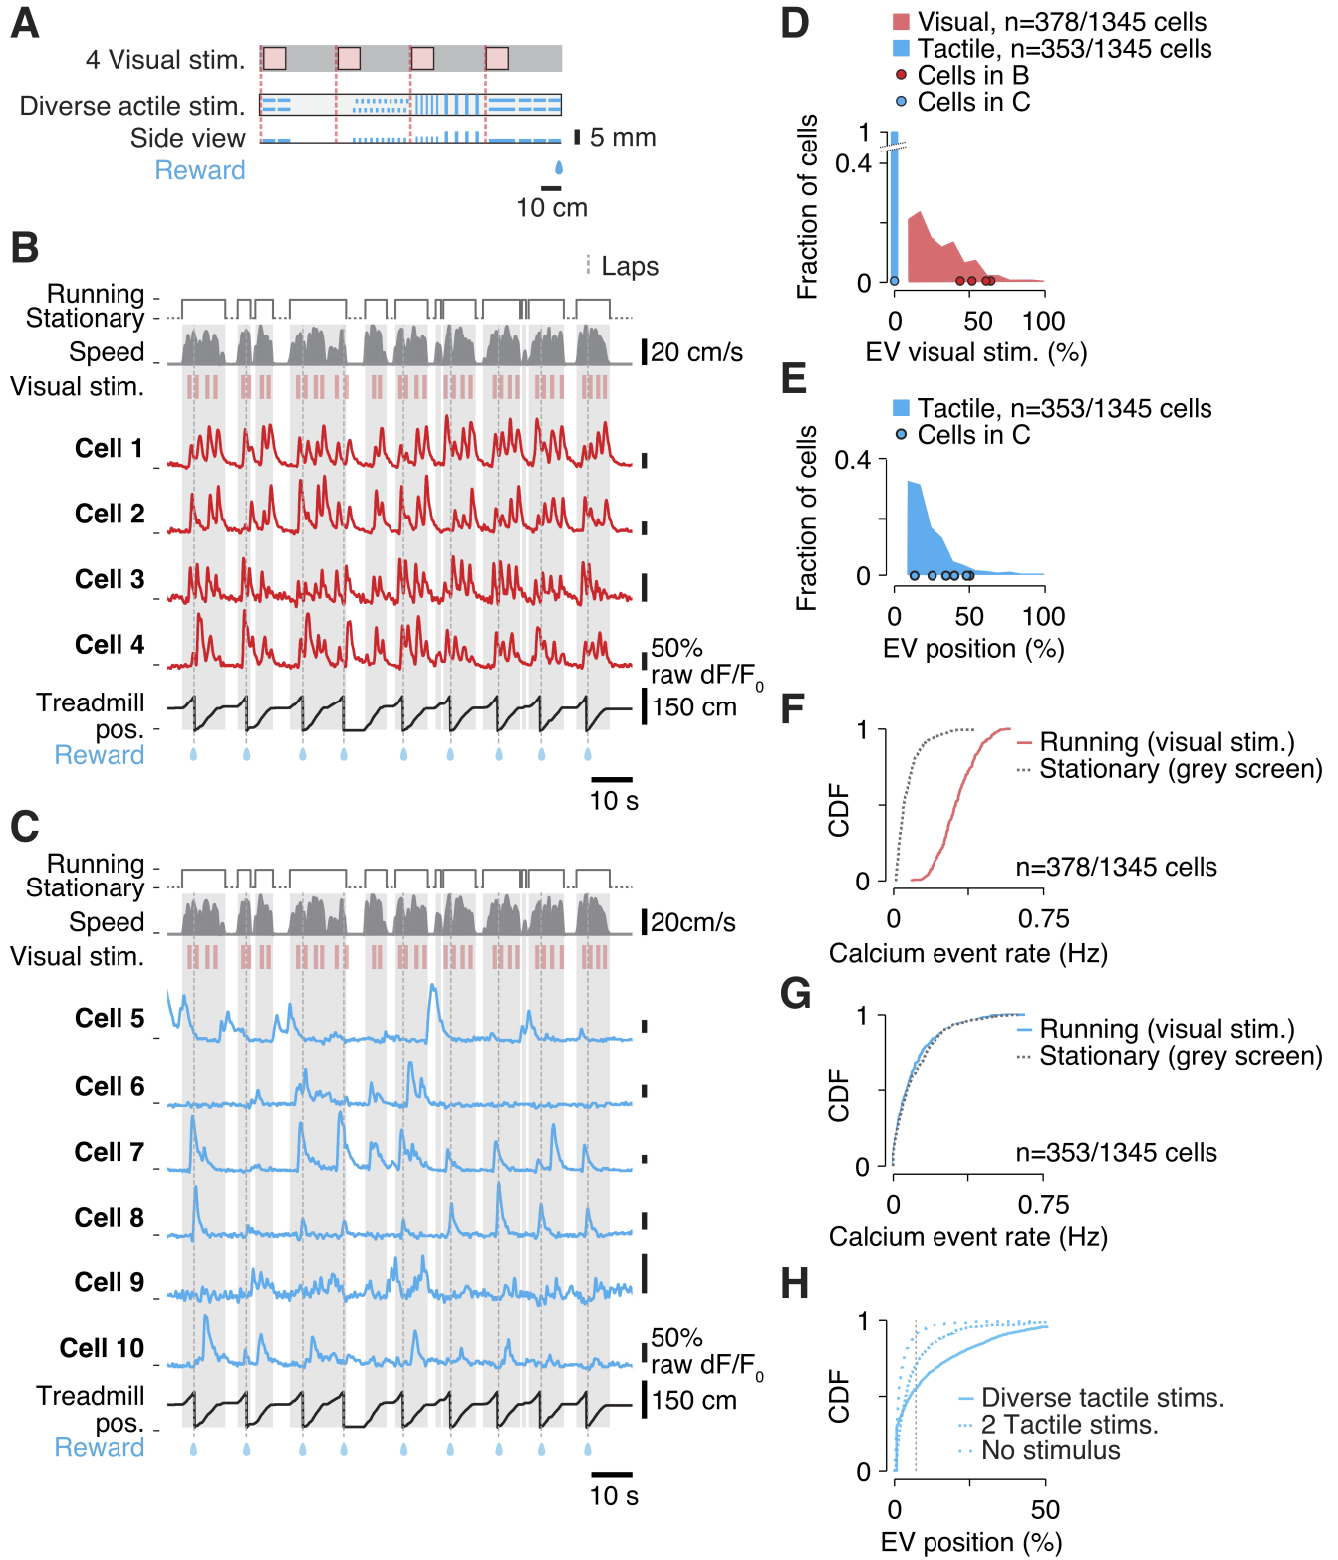

729 **Figure 5. V1 Tactile Activity is Diverse and Selective**

730 (A) Raster plots of calcium activity as a function of position of six simultaneously-imaged L2/3  
731 neurons (cells 5 to 10 in Fig. 4C) on the treadmill with diverse tactile stimuli (top). The neurons  
732 show diverse and selective activity. Dashed lines (red) indicate visual stimulus onset. For  
733 contrasting visually evoked activity of cells 1 to 4 (Fig. 4) see raster plots in Suppl. Fig. S7.  
734 (B) Trial average activity histogram of the activities in A.  
735 (C) Auto-correlation half-width (correlation length) of position-related activity of the tactile V1  
736 neurons. Blue markers indicate cells in A,B.  
737 (D) Preferred position vs. selectivity index for neurons in C. Preferred position defined as belt  
738 position of peak amplitude. Selectivity index defined as circular variance. Blue markers indicate  
739 cells in A,B.  
740 (E) Mean spatial population vector correlation matrix of the tactile V1 population activity. Note  
741 how activity is clustered at specific belt positions visible in clustering of correlation coefficients.  
742 See also Supp. Fig. S8.  
743



Figure 5.

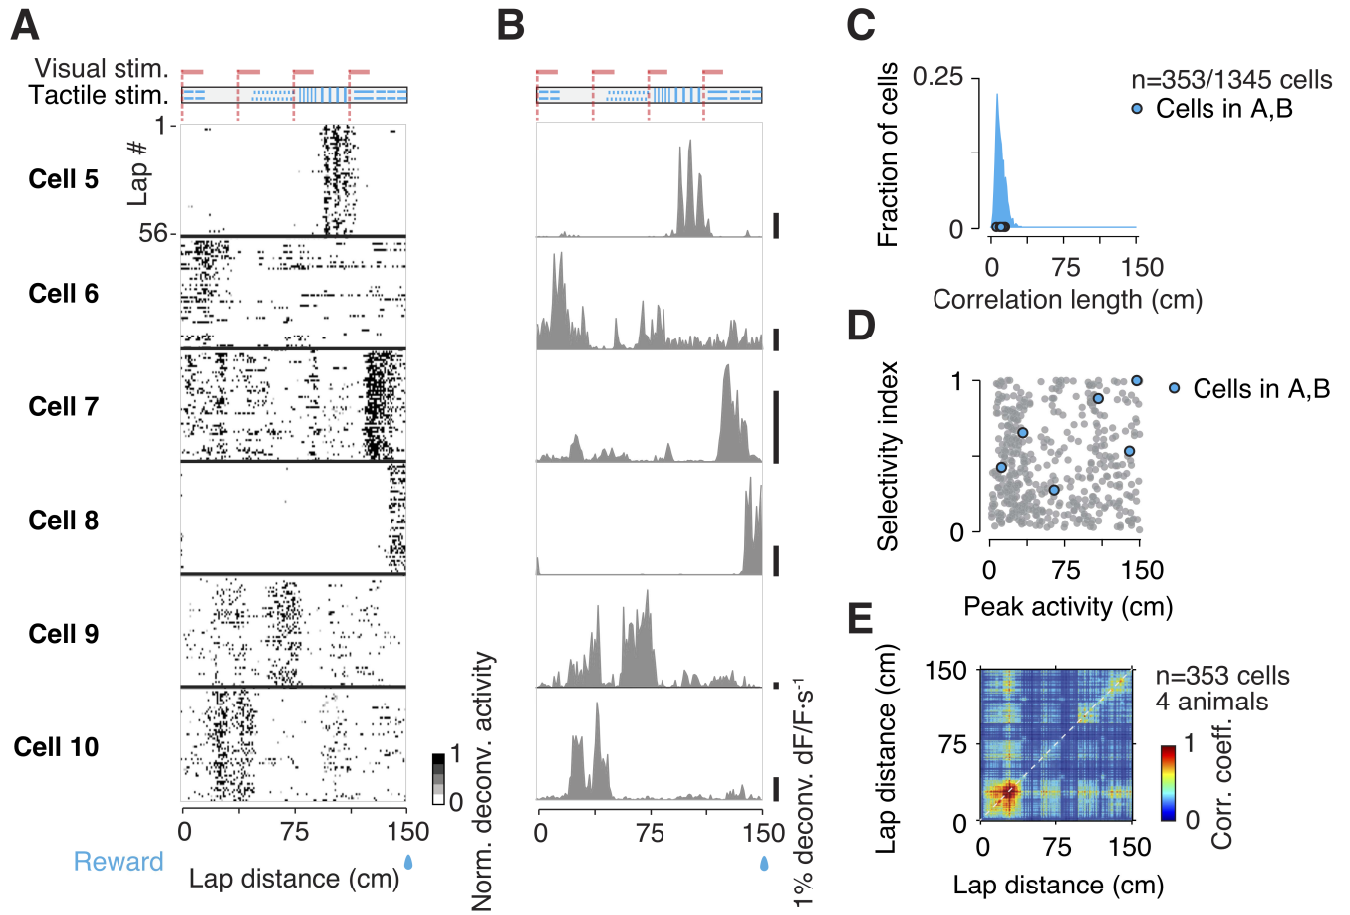

745 **Figure 6. Evidence that Tactile Context Modulates V1 Visual Responses**

746 (A) Visual response modulations. Top: The three visual stimulus windows A, B and C not  
747 accompanied by reward delivery are considered for investigating visual response modulations  
748 while the animal moves across locally distinct tactile stimuli (blue) on the belt. Bottom: Visual  
749 responses to identical noise stimulation of eight simultaneously imaged V1 cells while the  
750 animals move across treadmill positions A, B and C. Note how individual cells show distinct  
751 preferences to the stimuli presented at either treadmill position. Shaded curves represent s.e.m.  
752 MI indicates visual response modulation index. See also Suppl. Fig. S9A,B.

753 (B) Left: Average pupil dilation during visual stimulus windows A, B, C and R (reward). Right:  
754 Average locomotion speed during visual stimulus windows.

755 (C) Electrophysiology data. Histogram of response modulation index (MI) of the visually  
756 activated V1 population (all cells, grey; MI with effect size  $> 1$ , black). See also Suppl. Fig.  
757 S9A,B,D.

758 (D) Visual modulations extent across V1 layers. Left: Scatter of MI of electrophysiology data vs.  
759 cortical depth of recording site shows that visual response modulations. Right: Scatter of effect  
760 size (ES) vs. cortical depth. Black markers indicate MI with  $ES > 1$ .

761 (E) Same depiction as B for imaging data. See also Suppl. Fig. S9C.

762 (F) Visual response modulations depend on sensory information from tactile stimuli. Modulation  
763 index (left) and effect size (right) are decreased when contacts between whiskers and tactile  
764 stimuli are prevented (yellow curves).

765

Figure 6.

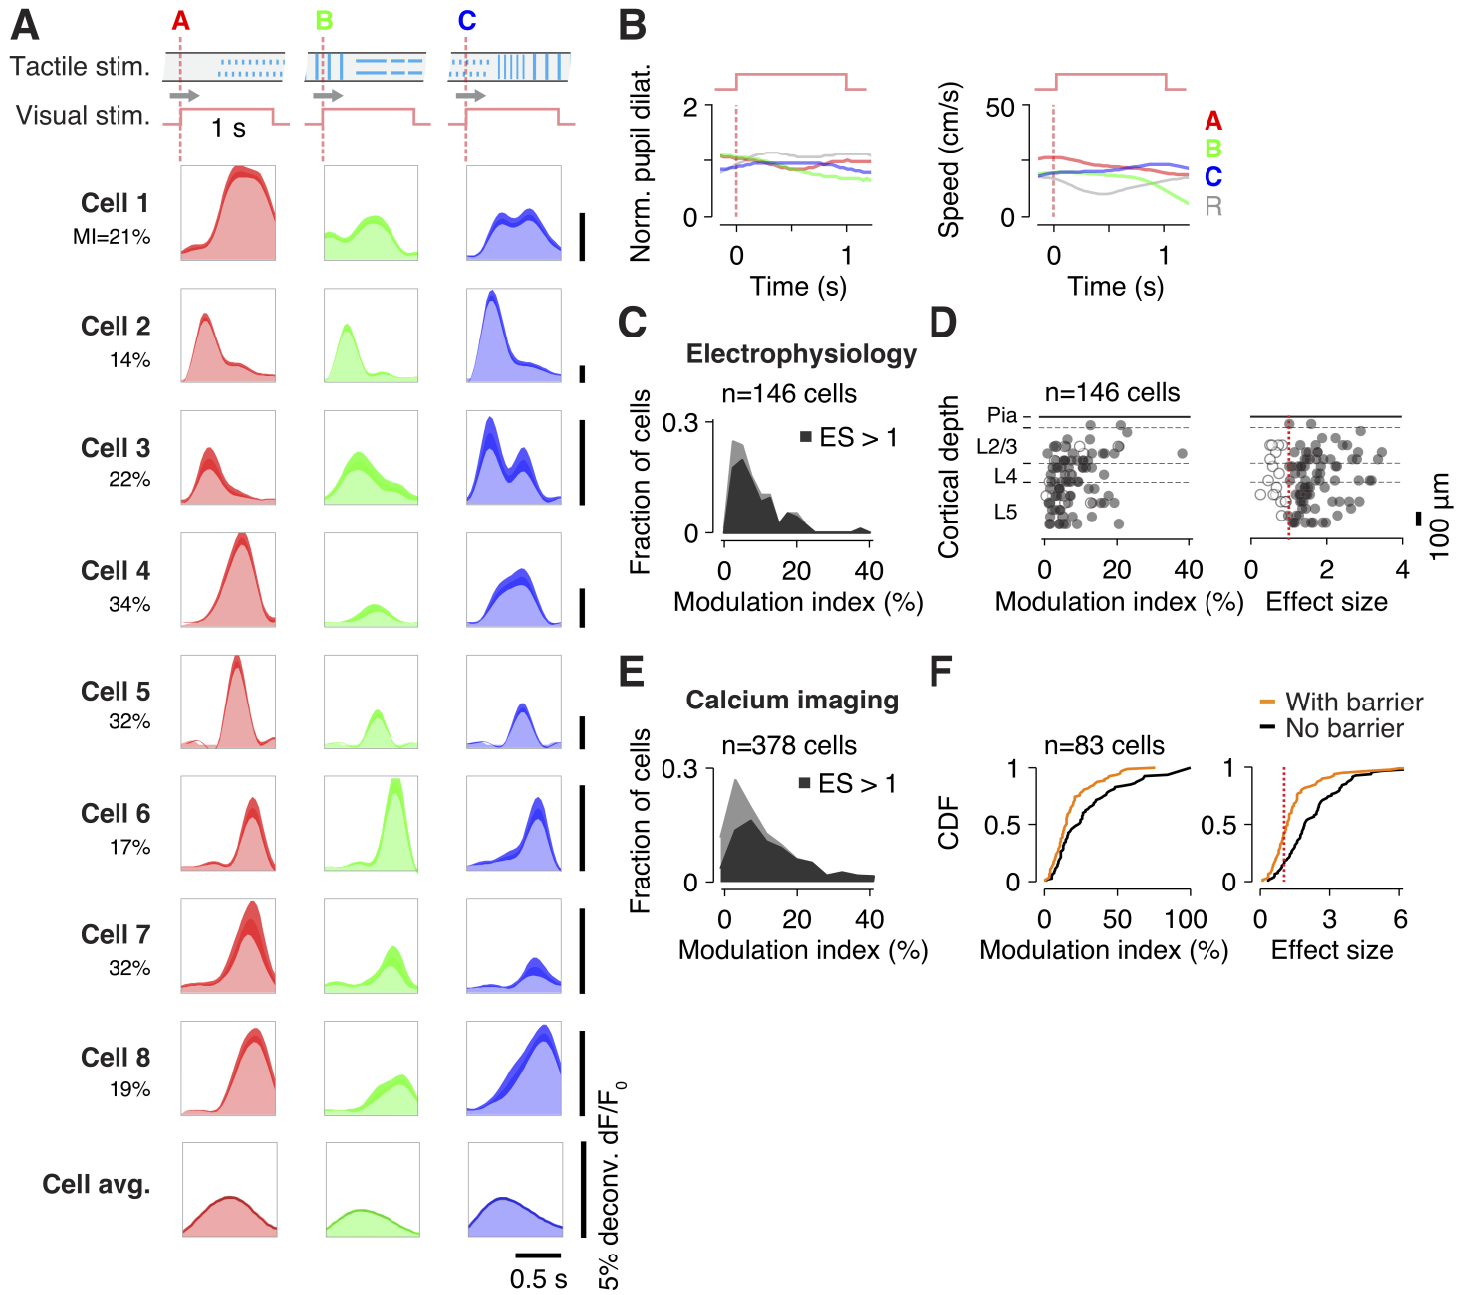

## 767 **EXPERIMENTAL PROCEDURES**

768

### 769 **Animals**

770 All animal procedures were approved by the Animal Ethics Committee of KU Leuven. We report  
771 on twenty-three normally-reared, single-housed male mice. Of these, nineteen were C57Bl/6j  
772 mice (22 to 30 gr, 2 to 5 months) and four were Thy1-GCaMP6 mice ((Dana et al., 2014). Mice  
773 were implanted with a head plate and trained to move on a linear, 150-cm treadmill belt for a  
774 periodic water reward (Royer et al., 2012). Eighteen mice were implanted with a cranial window  
775 for chronic cellular imaging (Goldey et al., 2014) in monocular V1 (n = 14), in CA1 pyramidal  
776 layer in dorsal hippocampus (n = 3 Thy1), or in S1 barrel cortex (n = 1 Thy1). Five mice were  
777 craniotomised for acute electrophysiological recordings with multi-site silicon probes.

778

### 779 **Surgical Procedures**

780 Mice were injected with dexamethasone (3.2 mg/kg I.M., 4 h before surgery), anaesthetised with  
781 isoflurane (induced 3 %, 0.8 L/min O<sub>2</sub>; sustained 1–1.5 %, 0.5 L/min O<sub>2</sub>), and implanted with a  
782 titanium head plate.

783 For cellular imaging in V1 and S1, mice were craniotomised and implanted with a 5-mm cranial  
784 glass window centred over left visual cortex (1.6 mm anterior to lambda, 3.1 mm lateral to  
785 midline). Head plate and cranial windows were affixed with dental cement (Metabond, Crown &  
786 Bridge and Kerr Tab, Kerr Dental) mixed with black tempera pigment to provide light shielding  
787 during fluorescence imaging.

788 For cellular imaging in CA1, mice were craniotomised (2 mm anterior to lambda, 1.8 mm lateral  
789 to midline). A 3-mm-diameter slab of visual cortex above CA1 was ablated manually under  
790 visual guidance until cortical white matter was exposed. Mice were implanted with a 3-mm  
791 cranial window holding a 1.5-mm long glass tube, following surgical procedures as described.

792 For acute recordings, a 1-mm craniotomy was made above V1 (3.8 mm posterior to bregma, 2.5  
793 mm lateral to midline). Two stainless steel screws used as reference and ground electrodes  
794 were implanted above cerebellum. Craniotomies were covered with a cover glass and protected  
795 with fast-curing silicone (Kwik-Cast, WPI).

796 All mice received post-operative treatment for 60 hours (buprenorphine 0.2 mg/kg I.M. and  
797 cefazolin 15 mg/kg I.M. in 12-hour intervals) and were given five days to recover.

798

## 799 **Viral Vector Injections**

800 Mice were injected with dexamethasone (3.2 mg/kg I.M., min. 4 h before surgery), anesthetized  
801 as described, and cranial windows were removed. An adeno-associated virus (AAV) construct  
802 containing GCaMP6m (n = 11 animals) or GCaMP6f (n = 3 animals) and the synapsin promoter  
803 (AAV1.Syn.GCaMP6m/f.WPRE.SV40, U Penn Vector Core) (Chen et al., 2013) was injected to  
804 monocular V1 or dorsal CA1. In V1, 500 nL AAV solution were injected at cortical depths of 250  
805 to 450  $\mu\text{m}$ . The AAV solution contained 25 % D-Mannitol solution (10 % in PBS) to increase  
806 transfection efficacy and 0.25  $\mu\text{L}$  sulforhodamine SR101 for fluorescent monitoring of the  
807 loading (green light excitation, 560 nm; red light emission, 630 nm).

808 In CA1, 200 nL AAV solution were injected at depths of 1,500  $\mu\text{m}$  before ablation of visual  
809 cortex (2 mm anterior to lambda, 1.8 mm lateral to midline).

810 Injections were performed using bevelled glass capillaries ( $\sim 20 \mu\text{m}$  tip diameter, Drummond  
811 Sci.) at low injection rates (50 or 100 nL/min) using a microliter injection system (Nanoject II,  
812 Drummond Sci.). Cranial windows were replaced and mice recovered as described.

813

## 814 **Treadmill Assay**

815 The treadmill assay was adapted from Royer et al. (Royer et al., 2012) (Fig. 1A; Suppl. Fig.  
816 S1A). Two 3D-printed 10-cm diameter lightweight treadmill wheels mounted on a custom frame  
817 (Thorlabs) held a 150-cm long, 50-mm wide belt made of Velcro (Country Brook; experiments  
818 1,2) or velvet fabric (McMaster-Carr; experiment 3) (Suppl. Fig. S2A–D). Strips of materials  
819 attached to the belt formed the tactile stimuli. The tactile stimuli were covered from the animals'  
820 eyesight by a shield mounted 10 to 15 mm in front of the animals' nose and 1 cm above the belt  
821 ( $-45$  to  $45$  deg. azimuth,  $-30$  deg. elevation) (Fig. 1A; Suppl. Fig. S1B,C). Teflon tape (CS  
822 Hyde) was adhered to the platform to reduce friction.

823 A rotary encoder (Avago Tech) attached to treadmill shaft was used to monitor treadmill rotation  
824 and belt position at a resolution of 3.14 mm. Once per treadmill rotation, for reward delivery, a  
825 photoelectric sensor (Omron) detected a reflective strip attached to the underside of the belt  
826 triggering opening of an electromagnetic pinch valve (MSscientific) and controlling water  
827 delivery through a spout. A custom circuit board with a microcontroller (AT89LP52, Atmel)  
828 monitored encoder and sensor signals and controlled valve opening. All signals were acquired  
829 by a personal computer via a USB data acquisition board (MCC) and were sampled at 10 kHz  
830 and recorded with Presentation software (Neurobehavioral Systems).

831

### 832 **Behavioural Training**

833 Mice were habituated to handling for three days prior to all procedures. Five days after surgery,  
834 water intake was scheduled (1 mL per day), and animals were trained to head-fixed treadmill  
835 locomotion on a copy of the experimental apparatus equipped with a belt without tactile stimuli  
836 (Suppl. Fig. S2A). Mice were rewarded with tap water or 7.5 % sucrose solution, either manually  
837 after habituation using a pipette or automated at the end of each lap (10  $\mu$ L drop size). No visual  
838 stimuli were presented during training (isoluminant grey screen or ambient illumination).  
839 Training duration increased gradually from a few minutes to 1 hour per day over a period of two  
840 weeks. Training was completed when animals reached desired levels of locomotor activity (~3  
841 laps/min.).

842

### 843 **Flavoprotein Imaging**

844 Retinotopic mapping with flavoprotein imaging was used to determine the monocular subregion  
845 of V1 that was targeted for chronic cellular imaging. Blue LED light (470 nm, Thorlabs) was  
846 shone onto cortex and green light emission collected (510/84 nm filter, Semrock) at a frame rate  
847 of 5 fps using a 2x wide-field lens (NA = 0.055, Edmund Optics) and EMCCD camera (EM-C<sup>2</sup>,  
848 QImaging; 1004 by 1002 pixels, 4 by 4 binning). Fractional changes in fluorescence were  
849 normalised to baseline and averaged across 4-sec intervals to capture the slow time course of  
850 the flavoprotein auto-fluorescence signal. The location of monocular V1 was identified by eye to  
851 guide targeted viral vector delivery of the genetically encoded calcium indicator GCaMP6 at  
852 retinotopic locations corresponding to monocular V1.

853

### 854 **Two-Photon Imaging**

855 A custom-built two-photon microscope (NeuroLabware) was used to image somatic calcium  
856 signals of V1 neurons in layer 2/3 (125 to 350  $\mu$ m below the pial surface) and CA1 neurons in  
857 dorsal hippocampus, pyramidal cell layer (100 to 150  $\mu$ m below window) at frame rates of ~30  
858 fps (1154 by 512 pixel, 620 by 380  $\mu$ m field-of-view). Excitation light of a MaiTai DeepSee laser  
859 with group-delay dispersion (Spectra Physics / Newport) was scanned by galvo (Cambridge  
860 6215H) and resonant scanners (Cambridge CRS 8k) through a 16x lens (NA = 0.8, Nikon). Max.  
861 laser power output at the objective was limited to 20 to 60 mW, depending on the depth of field-  
862 of-view. GCaMP6 was excited at 920 nm and green light emission was collected using a green

863 filter (510/84 nm, Semrock) with a GaAsP photomultiplier tube (Hamamatsu). We used a black  
864 imaging chamber and blackout material (Thorlabs) to block stray light from the visual display  
865 (Goldey et al., 2014). Any leftover stray light (e.g. through the eyes and the brain) was  
866 subtracted out in the extraction of calcium time courses (Bonin et al., 2011).

867

## 868 **Electrophysiology**

869 A 256-channel DigiLynx system (Neuralynx) was used to record electrophysiological signals  
870 (sampling rate 32 kHz). A linear multi-site silicon probe (A16, 50  $\mu\text{m}$  electrode spacing,  
871 NeuroNexus) was lowered perpendicularly into V1 at stereotactic coordinates (3.8 mm posterior  
872 to bregma, 2.5 mm lateral to midline) using a micromanipulator (Scientifica) at 10- $\mu\text{m}$  steps.  
873 Once the probe penetrated the dura, the tip was lowered to cortical depths of 700 to 900  $\mu\text{m}$  at  
874 1- $\mu\text{m}$  steps. The procedures were monitored with a surgical stereoscope. Recordings started 20  
875 to 30 min after probes were in position and craniotomies were covered with 2.5 % agarose  
876 solution warmed to 37°C. Silicon probes had impedances ranging from 1 to 2 M $\Omega$ .

877

## 878 **Visual Stimulation**

879 For visual stimulation, a calibrated 22-inch LCD monitor (Samsung 2233RZ, 1680 by 1050 pixel  
880 resolution, 60 Hz refresh rate, average luminance 59  $\text{cd}/\text{m}^2$ ) was positioned 18 cm in front of the  
881 right eye, covering 120 by 80 degree in the right visual field (0 to 120 deg. central to peripheral  
882 and  $\pm 40$  deg. lower to upper visual field). Presentation software (Neurobehavioral Systems) was  
883 used to control visual stimulation, synchronised to the respective imaging frame rates of either  
884 one-photon (frame rate: 5 fps, EMCCD camera frame trigger) or two-photon (frame rate:  $\sim 30$   
885 fps, slow-axis galvanometer scan pulses) imaging. Visual stimulus frames were updated at 30  
886 fps. Visual stimuli were interleaved by a static grey screen stimulus (50 % luminance).

887 For retinotopic mapping, six 8-sec stimuli were presented in the right visual field in 10 to 20  
888 trials, covering a total of 0 to 120 deg. along the horizontal and  $\pm 40$  deg. along the vertical axis.  
889 Stimuli were comprised of horizontally and vertically oriented, 40 by 40 deg. wide square-wave  
890 gratings moving in four cardinal directions (0.08 cpd spatial freq., 4 Hz temporal freq.). Stimuli  
891 were interleaved by a static, 16-sec grey screen stimulus.

892 For testing the visual responsiveness of V1 neurons, two sets of visual stimuli were presented:  
893 A brief, repeating 1-sec visual noise stimulus or prolonged, 7.8-sec filtered noise stimuli of  
894 broader visual stimulus space (Suppl. Fig. S6A). The brief noise stimulus was composed of



895 drifting oriented edges of different scales and orientations (Bonin et al., 2011) covering upper  
896 and lower sections of the right visual field (60 by 60 deg., centred at 45 deg. azimuth, 0 deg.  
897 elevation; Suppl. Fig. S1C). Stimulus presentation was triggered by the animals' movement  
898 across discrete belt positions. The prolonged stimuli were composed of filtered noise containing  
899 logarithmic increases in spatial frequency (0.05 to 0.4 cpd) in two temporal frequency bands  
900 (0.5 to 1 Hz and 1 to 2 Hz) and eight orientations (0 to 157.5 deg.) covering the full screen (120  
901 by 80 deg.). Stimuli were interspersed by static, 50 % luminance grey screen stimuli.  
902 For the experiment in darkness, ambient light sources were switched off or covered with  
903 blackout material. Light levels were at the detection threshold of our luminance meter ( $< 0.01$   
904  $\text{cd/m}^2$ ).

905

### 906 **Eye Tracking**

907 Eye position and pupil size were measured with an infrared eye tracking camera placed in front  
908 of the right eye. Infrared light was focused on the eye with a far-red LED (735 nm, Thorlabs) and  
909 collimated lens (Thorlabs). Data was acquired at 30 fps with a CCD camera (AVT Prosilica  
910 GC660; Navitar Zoom 6000 lens) and StreamPix software (Norpix) and segmented using  
911 custom software.

912

### 913 **Experimental Design**

914 **Experiment 1:** Mice ( $n = 7$ ) first moved head-fixed on a treadmill belt without tactile stimuli for  
915 durations of 8 to 10 min. Subsequently, the belt was replaced with one containing two identical  
916 tactile stimuli at a distance from reward (Suppl. Fig. S2B) with the animals held in place  
917 maintaining the same imaging field-of-views. Tactile stimuli comprised four stereotyped foam  
918 material strips (2.5 cm spacing). The animals ran on the tactile belt for another 8 to 10 min. For  
919 a subset of animals ( $n = 4$ ), experiments were performed in darkness in combination with a 3D-  
920 printed, removable barrier placed between the whiskers and the treadmill belt that prevented the  
921 whiskers from contacting the tactile stimuli. This approach was chosen over trimming the  
922 whiskers to avoid any form of plasticity that may occur upon whisker ablation. It was ensured  
923 the barrier did not contact the animal's nose or mouth to not impair receiving water reward or  
924 locomotion. The animals moved on the tactile belt with the barrier for another 8 to 10 min. An  
925 unconditional sucrose water reward (2.5  $\mu\text{L}$ ) was delivered in all conditions at the end of each  
926 lap.

927 **Experiment 2:** Mice ( $n = 7$ , same animals as in experiment 1) moved on a belt without tactile  
928 stimuli for 8 to 10 min. (Suppl. Fig. S2C). To elicit visual responses, the same 1-sec visual noise  
929 stimulus (Suppl. Fig. S1C; S2C,D) was triggered in every treadmill lap as the animals reached  
930 two discrete belt positions. Stimuli were interspersed by static grey screen stimuli of variable  
931 duration. The animals moved on the treadmill under visual stimulation for another 8 to 10 min.  
932 The belt was then replaced with the tactile belt described in experiment 1 and the animals  
933 moved for another 8 to 10 min.  
934 To test visual responsiveness to a broader visual stimulus space, a separate group of animals  
935 ( $n = 3$ ) moved on the treadmill with the prolonged filtered noise stimuli. Stimuli were presented  
936 for 7 to 10 trials and were not triggered by the animal's movement. Stimuli were interspersed by  
937 static grey screen stimuli of fixed duration (2 sec) (Suppl. Fig. S6A).

938 In both sets of runs, reward was delivered as described.

939 **Experiment 3:** A group of nine mice (4 used in V1 imaging, 5 in electrophysiology experiments)  
940 moved on a feature-rich tactile treadmill belt endowed with diverse tactile stimuli made from  
941 foam material, duct tape, and hot glue, attached to distinct belt positions (Suppl. Fig. S2D). The  
942 same brief visual noise stimulus was presented at four equidistant belt positions, thereby  
943 creating distinct combinations of the visual stimulus and varied tactile stimuli. Mice moved on  
944 the feature-rich belt for periods of 20 to 30 min. A group of three mice, moved on a feature-rich  
945 tactile belt in hippocampal imaging experiments without visual stimuli, in ambient light condition.

946

## 947 **DATA ANALYSIS**

948 All data were analysed in MATLAB (The Mathworks, Natick, MA).

949

## 950 **Calcium Imaging Data**

951 Images were registered using TurboReg (Thevenaz et al., 1998). Regions of interest (ROIs) of  
952 active neural cell bodies were identified manually using a pixelwise local spatiotemporal  
953 correlation criterion (3 by 3 pixels neighbourhood, thresholded at correlation coefficients  $> 0.95$ )  
954 (Smith and Hausser, 2010). Raw calcium time courses were calculated by averaging pixel  
955 intensities over each ROI and subtracting an estimate of neuropil contamination. The neuropil  
956 signal was computed by averaging a ring of pixels around ROIs and using a low-rank SVD  
957 approximation (Bonin et al., 2011). Raw calcium time courses were expressed as fractional  
958 changes above baseline fluorescence ( $dF/F_0$ ). Baselines were computed by linear regression to

959 the lowest 10 % of the raw time courses.  $dF/F_0$  time courses were deconvolved to estimate firing  
960 rates (Vogelstein et al., 2010).

961

## 962 **Electrophysiology**

963 Raw voltage signals were high-pass filtered (0.8 to 5 kHz) for spike detection. All 16 channels  
964 were grouped into four groups with each group containing four channels. Spike sorting was  
965 done for each group. Spike waveforms were extracted, principal components computed and  
966 automatically clustered with KlustaKwik (Kadir et al., 2014). Cluster quality was manually  
967 verified or corrected using Klusters (Hazan et al., 2006). Only clusters with stable features  
968 through time and clear refractory periods were included. We classified regular and fast spiking  
969 neurons based on the peak-to-trough amplitude ratio and the end slope of their spike  
970 waveforms (Niell and Stryker, 2008).

971

## 972 **Behavioural Data**

973 Rotary encoder increments were used to calculate treadmill position at centimetre precision and  
974 instantaneous treadmill speed in cm/s. After every completed lap, encoder increments were  
975 reset to zero to prevent potential accumulation of treadmill slip.

976 Camera frames from the eye tracker were smoothed with a 2D Gaussian filter, contrast-  
977 thresholded, and binarised, resulting in black-and-white images. For every image, eye position  
978 and pupil diameter were detected by fitting an ellipsis to the pupil. Pupil size was calculated  
979 from the equivalent diameter of the ellipsis and expressed in  $\text{mm}^2$ . Eye position was expressed  
980 as relative change in degree relative to the average eye centre position within individual  
981 experiments. Artefacts in the data resulting from e.g. eye blinks were removed using a threshold  
982 criterion (mean  $\pm$  2-times s.d.).

983 Encoder and eye data were resampled at the frame rate of the two-photon microscope.

984

## 985 **Selection of Active Neurons**

986 V1 neurons were selected if they exhibited one or more calcium transients in at least 25 % of  
987 the laps ( $>$  baseline  $dF/F_0 + 3$ -times s.d.). This approach restricted analyses to neurons showing  
988 a minimum of repeatable activation across laps.

989 CA1 neurons were selected if they exhibited position-normalized activity  $>$  .03 %  $dF/F_0$  (see  
990 Position Related Analysis).

991

## 992 **Visual Response Analysis**

993 Visual responsiveness (Fig. 4) was measured by computing the fraction of variance in the  
994 calcium time courses that is explained by event-triggered averaged response models derived  
995 from the neuron's deconvolved time courses at stimulus onsets (0 to 1 sec window) and offsets  
996 (1 to 1.5 sec window), thereby including visual ON and OFF responsive cells. EV was two-fold  
997 cross-validated (100-times) estimating how a random half of the trials predict the other half. EV  
998 visual stim. is the sum of EVs calculated for stimulus onsets and offsets.

999

## 1000 **Position-Related Analysis**

1001 A standard position-related procedure was used to relate calcium time courses to location on  
1002 the treadmill (Gothard et al., 1996). The treadmill lap was divided in 150 1-cm intervals for V1  
1003 data and 100 1.5-cm intervals for CA1 data. Average deconvolved calcium activity was  
1004 computed for each interval for each lap and normalized by the time the animal spent at each  
1005 interval, resulting in position-related activity profiles. Accordingly, raw calcium time courses and  
1006 locomotion speed were normalized to treadmill location with the same procedure (see Figs 1–3).  
1007 Trial-to-trial reliability of activity profiles was measured by computing the fraction of variance in  
1008 single trials that is explained by the average across laps. Formally, the measure of explained  
1009 variance follows  $EV_{\text{position}} = (P_r - P_e) / P_r * 100$ , where  $P_r$  is the variance of the single trial  
1010 responses and  $P_e$  is the mean square distance between single trial responses and the across  
1011 trial. EV was two-fold cross-validated (100-times) estimating how a random half of the trials  
1012 predicts the other half.

1013

## 1014 **Tactile Position Preference and Selectivity**

1015 A circular analysis was used to calculate for each tactile neuron the preferred belt position and  
1016 position selectivity. Circular variance is commonly used to quantify tuning for circular variables  
1017 (e.g. orientation selectivity). As the treadmill belt is circular this analysis is warranted here.  
1018 Preferred position was determined by mapping the neurons' lap-to-lap activity average to a  
1019 polar coordinate system with 1-cm intervals and calculating the angle of the vector sum of  
1020 calcium activity. Position selectivity was defined as the circular variance of the polar  
1021 representation of the average activity.

1022 For each neuron, the auto-correlation of the position-normalized activity profiles was computed.  
1023 The spatial extent of tactile activity was defined as the half-width of the auto-correlation function  
1024 around zero lag at half-maximum amplitude.

1025

### 1026 **Visual Response Modulations**

1027 For each visual neuron (EV visual stim. > 10 %), responses to the visual probe stimuli were  
1028 sorted by onset location (Fig. 4A, Suppl. Fig. S9A). A modulation index (MI) was derived by  
1029 projecting visual responses onto a polar 3-axes coordinate system (Suppl. Fig. S9B), with each  
1030 axis shifted by 120 degrees and corresponding to one of the stimulus locations A to C. MI was  
1031 computed by dividing the vector sum by the average response across stimuli, using the formula:

$$1032 MI = [P_A + P_B + P_C] / \sum (P_i) * 100.$$

1033 The effect size (ES), or d-prime – a measure quantifying differences in mean, of the response  
1034 modulation was computed from the distributions of the data and a response shuffle across  
1035 stimulus locations (Suppl. Fig. S9B).

1036 MI and ES analyses were restricted to the stimuli triggered at track locations A, B and C to  
1037 exclude potential bias from reward context (location R) (Suppl. Fig. S9A).

1038

### 1039 **Correlation with Behavioural Variables**

1040 Spike responses of visual V1 neurons were correlated with behavioural variables locomotion  
1041 speed (instantaneous speed at stimulus onset), eye position (relative position of pupil centre),  
1042 and visual stimulation rate (stimulus frequency in the past 10 sec). Visual responses and  
1043 behavioural variables were averaged within visual stimulus windows (0 to 1 sec after stimulus  
1044 onset). Results were plotted in joint histograms with 10 equal-sized bins for the Pearson  
1045 correlation coefficients between neural activity and behavioural variable, and 20 bins for the  
1046 neuron's modulation indices (Suppl. Fig. S9E).

1047 Joint histograms of modulation indices and effect sizes were generated for calcium imaging data  
1048 for lap durations with the bottom and top 25 % of laps, averaged from a window centred around  
1049 the reward location (-5 to 10 cm) (Suppl. Fig. S9F).

1050

1051

1052

1053

1054 **Population Vector Analysis**

1055 A standard spatial analysis was used to relate calcium activity to treadmill location (Terrazas et  
1056 al., 2005). Mean population vector correlation matrices for CA1 and V1 data were computed  
1057 from the averaged position-normalized activity profiles of individual neurons (Suppl. Fig. S8).
